# Supplementary material for: Machine learning and molecular descriptors enable rational solvent selection in asymmetric catalysis
Source: Royal Society of Chemistry journal article supplement (doi:10.1039/c9sc01844a), 2019-01-01
Supplement: c9sc01844a2.xlsx [file c9sc01844a2.xlsx]

## Sheet: molecular descriptors library
Solvent no.	Stenutz name	COSMO name	CAS number	Formula	MW (g/mol)	Density (g/mL)	Molar volume (mL/mol)	Refractive index	Mol. refr. pow. (mL/mol)	Dielectric constant	Dipole moment (D)	Melting point (°C)	Boiling point (°C)	Viscosity (cP)	lnP (partition coeff.)	Vapour pressure (mbar)	Henry's constant	lngamma	HBD	neutral	HBA
1	(trichloromethyl)benzene	(trichloromethyl)-benzene	98-07-7	C7H5Cl3	195.47	1.173	166.6	1.557	53.67	6.9	2.14	-4	220	1.85091	3.67854	0.195276	2015.87	1.23348	0.20535	18.7983	0
2	(1Z,5Z)-cycloocta-1,5-diene	1,5-cyclooctadiene	111-78-4	C8H12	108.18	0.88	122.9	1.493	35.73	2.38	0.17	-69	148	0.998695	2.98478	8.87108	1884.53	1.44357	0	15.2165	0.47105
3	(2E,4E)-2,4-hexadiene	trans,trans-2,4-hexadiene	5194-51-4	C6H10	82.15	0.727	112.9	1.456	30.7	2.22	0.36	-79	79	0.373924	3.05145	8.87108	2089.16	1.47095	0	14.9023	0.04505
4	(dichloromethyl)benzene	(dichloromethyl)-benzene	98-87-3	C7H6Cl2	161.03	1.25	128.8	1.55	41.04	6.9	2.05	-16	205	1.98964	2.93807	225.182	2235.31	-0.0532694	0.8684	16.7703	0
5	(E)-1,3-pentadiene	1-trans-3-pentadiene	2004-70-8	C5H8	68.12	0.683	99.7	1.43	25.77	2.32	0.68	-87	42	0.295019	2.47268	702.075	2326.13	1.16406	0	12.8734	0.0397
6	(E)-2-butenenitrile	(e)-2-butenenitrile	627-26-9	C4H5N	67.09	0.823	81.6	1.416	20.47	28.1	4.5	-52	122	0.498586	0.175344	18.1355	3633.34	0.410081	0.469	10.1084	1.30735
7	(Z)-3-hexene	cis-3-hexene	592-47-2	C6H12	84.16	0.678	124.1	1.394	29.67	2.06	0.34	-138	66	0.327912	3.3534	318.264	1891.66	2.25639	0	14.8632	0.1899
8	1,1,1-trichloroethane	1,1,1-trichloroethane	71-55-6	C2H3Cl3	133.4	1.338	99.7	1.438	26.17	7.25	1.9	-30	74	0.394441	2.45215	73.5876	2236.31	1.23081	0.26225	13.0415	0
9	1,1,1-trichlorotrifluoroethane	1,1,1-trichloro-2,2,2-trifluoroethane	354-58-5	C2Cl3F3	187.38	1.566	119.7	1.36	26.41	2.44	0.74	14	46	0.274792	3.1679	504.256	2093.92	2.95394	0.02865	14.8904	0
10	1,1,2,2-tetrabromoethane	1,1,2,2-tetrabromoethane	79-27-6	C2H2Br4	345.65	2.967	116.5	1.628	41.34	7	1.57	0	244	1.76329	2.98483	0.0605904	3620.54	0.07024	1.486	15.3049	0
11	1,1,2,2-tetrachloroethane	1,1,2,2-tetrachloroethane	79-34-5	C2H2Cl4	167.85	1.59	105.6	1.494	30.71	8.42	1.33	-44	144	0.717484	2.46427	5.48117	2294.92	-1.7442	1.61285	13.4113	0
12	1,1,2-trichloro-1,2,2-trifluoroethane	1,1,2-trichloro-1,2,2-trifluoroethane	76-13-1	C2Cl3F3	187.38	1.564	119.8	1.356	26.16	2.41	0.86	-35	48	0.275144	3.2004	509.961	2088.96	3.03715	0.00575	14.926	0
13	1,1,2-trichloroethane	1,1,2-trichloroethane	79-00-5	C2H3Cl3	133.4	1.443	92.4	1.471	25.84	7.28	1.36	-37	114	0.628916	1.947	19.5757	2492.33	-1.07253	1.77655	11.7277	0
14	1,1-dichloroethane	1,1-dichloroethane	75-34-3	C2H4Cl2	98.96	1.176	84.1	1.416	21.12	10	2.35	-97	57	0.377929	1.72908	161.657	2552.23	-0.256981	0.72105	10.9207	0
15	1,1-dichloroethene	1,1-dichloroethylene	75-35-4	C2H2Cl2	96.94	1.175	82.5	1.425	21.1	4.67	1.25	-123	32	0.261322	2.15192	757.543	2556.47	0.897392	0.50725	10.7452	0
16	1,1-diethoxyethane	1,1-diethoxyethane	105-57-7	C6H14O2	118.18	0.826	143.1	1.381	33.22	3.8	1.22	-100	103	0.752066	2.0224	11.1721	1827.2	0.465839	0	16.2302	1.45955
17	1,1-diethoxymethane	diethoxymethane	462-95-3	C5H12O2	104.15	0.831	125.3	1.373	28.55	2.53	1.25	-66	87	0.599625	1.62539	36.0262	1972.66	0.3131	0	14.468	1.52415
18	1,2,3,4-tetrachlorobenzene	1,2,3,4-tetrachlorobenzene	634-66-2	C6H2Cl4	215.89	1.858	116.2	1.58	38.67	3.2	1.9	46	254	1.90383	3.85573	0.165336	2036.95	1.2468	0.71175	18.3468	0
19	1,2,3,4-tetramethylbenzene	1,2,3,4-tetramethylbenzene	488-23-3	C10H14	134.22	0.901	149	1.515	44.92	2.59	0.39	-4	205	1.28889	3.84561	1.82322	1818.76	1.5356	0	18.8123	0.04505
20	1,2,3-propanetriol	glycerol	56-81-5	C3H8O3	92.09	1.26	73.1	1.475	20.56	47	2.56	18	290	32.526	-1.27406	0.0119753	3779.8	0.816488	1.39195	8.3081	2.46495
21	1,2,3-tribromopropane	indane	96-11-7	C3H5Br3	280.78	2.402	116.9	1.582	39.01	6.45	1.54	17	220	1.26074	3.18121	4.05485	1990.09	1.31432	0.0015	16.2717	0.0006
22	1,2,3-trichloropropane	1,2,3-trichloropropane	96-18-4	C3H5Cl3	147.43	1.394	105.8	1.486	30.36	7.9	1.67	-14	157	0.934666	1.97369	3.23258	2420.38	-0.505783	1.69175	13.2695	0
23	1,2,4-trichlorobenzene	1,2,4-trichlorobenzene	120-82-1	C6H3Cl3	181.45	1.454	124.8	1.572	41.04	2.24	1.26	17	214	1.55783	3.46561	0.590271	2134.54	0.810072	0.95605	16.6983	0
24	1,2-diaminoethane	1,2-diaminoethane	107-15-3	C2H8N2	60.1	0.899	66.9	1.457	18.19	14.2	1.92	9	116	0.923293	-1.2608	19.8452	3182.05	-0.717264	1.2989	7.56195	1.7249
25	1,2-dibromoethane	1,2-dibromoethane	106-93-4	C2H4Br2	187.86	2.18	86.2	1.538	26.95	4.75	1.04	10	132	0.673837	1.86831	13.3484	3599.2	0.387301	1.0244	11.7691	0
26	1,2-dichlorobenzene	1,2-dichlorobenzene	95-50-1	C6H4Cl2	147	1.306	112.6	1.551	35.94	9.93	2.14	-17	181	1.11666	2.94754	2.16978	2299.48	0.868209	0.39855	15.375	0
27	1,2-dichloroethane	1,2-dichloroethane	107-06-2	C2H4Cl2	98.96	1.253	79	1.445	21.01	10.36	1.83	-35	84	0.516406	1.33741	222.095	2904.4	-0.372542	1.2021	10.4996	0
28	1,2-dichloropropane	1,2-dichloropropane	78-87-5	C3H6Cl2	112.99	1.155	97.8	1.439	25.73	8.93	1.85	-100	96	0.528983	1.96306	55.659	2355.37	0.218629	0.53295	12.8567	0
29	1,2-difluorobenzene	o-difluorobenzene	367-11-3	C6H4F2	114.09	1.15	99.2	1.443	26.3	14.26	2.53	92	94	0.599869	2.29179	65.9092	2627.52	0.715398	0.40435	13.2043	0
30	1,2-dimethoxybenzene	1,2-dimethoxybenzene	91-16-7	C8H10O2	138.17	1.084	127.5	1.532	39.5	4.09	1.35	23	206	2.2753	1.80575	0.119233	2361.94	0.340676	0.076	16.7628	1.09935
31	1,2-dimethoxyethane	1,2-dimethoxyethane	110-71-4	C4H10O2	90.12	0.869	103.7	1.38	24	7.2	1.71	-58	85	0.422233	0.33033	83.4235	2260.69	-0.37605	0	12.4398	1.84665
32	1,2-dimethylbenzene	1,2-dimethylbenzene	95-47-6	C8H10	106.17	0.88	120.6	1.505	35.8	2.57	0.45	-25	144	0.869183	3.01022	12.27	2101.99	1.22852	0.0005	15.7194	0
33	1,2-diphenylethane	1,1'-(1,2-ethanediyl)bis-benzene	103-29-7	C14H14	182.27	0.966	188.7	1.57	61.93	2.38	0	52	285	6.73905	4.29877	0.00477084	3302.84	0.964046	0.02565	23.4541	0
34	1,2-propanediol	propyleneglycol	57-55-6	C3H8O2	76.1	1.036	73.4	1.431	19.01	32	2.27	-60	187	10.8192	-0.589779	0.217976	1564.35	0.365799	1.16915	8.52305	1.9315
35	1,3,3-trimethyl-2-oxabicyclo[2.2.2]octane	1,8-cineole	470-82-6	C10H18O	154.25	0.923	167.2	1.458	45.63	4.84	1.58	2	176	1.75386	3.02246	0.536905	1888.9	1.05247	0	18.3021	0.8641
36	1,3,5-trimethylbenzene	1,3,5-trimethylbenzene	108-67-8	C9H12	120.19	0.864	139.2	1.499	40.86	2.4	0.1	-45	165	1.11574	3.65766	3.86599	2260	1.49627	0	17.8634	0.00965
37	1,3-cyclohexadiene	1,3-cyclohexadiene	592-57-4	C6H8	80.13	0.847	94.6	1.473	26.55	2.66	0.38	-89	80	0.533747	2.36726	131.572	2932.14	1.21212	0	12.5042	0.08525
38	1,3-dibromobenzene	1,3-dibromobenzene	108-36-1	C6H4Br2	235.91	1.952	120.9	1.606	41.68	5	1.37	-7	219	1.98118	3.34377	0.150465	2264.1	1.6791	0.6513	16.3801	0
39	1,3-dichlorobenzene	1,3-dichlorobenzene	541-73-1	C6H4Cl2	147	1.288	114.1	1.546	36.14	5	1.68	-25	173	1.18388	3.04441	2.33552	2504.13	0.754283	0.66175	15.3813	0
40	1,3-dichloropropane	1,3-dichloropropane	142-28-9	C3H6Cl2	112.99	1.183	95.5	1.449	25.62	9.51	2.09	-100	120	0.622126	1.76363	16.9713	2613.67	0.349535	0.2327	13.1923	0
41	1,3-difluorobenzene	m-difluorobenzene	372-18-9	C6H4F2	114.09	1.147	99.5	1.437	26.06	5.24	1.55	82	83	0.615805	2.2907	86.7506	2056.93	0.503091	0.6442	13.0309	0
42	1,3-dimethylbenzene	1,3-dimethylbenzene	108-38-3	C8H10	106.17	0.86	123.5	1.497	36.14	2.4	0.31	-48	139	0.88182	3.12399	11.5711	2099.84	1.28845	0.0009	15.9719	0
43	1,3-dimethyltetrahydropyrimidin-2(1H)-one	1,3-dimethyltetrahydropyrimidin-2(1h)-one	7226-23-5	C6H12N2O	128.17	1.064	120.5	1.488	34.71	36.12	4.17	-20	246	1.79489	0.359114	0.158837	5535.65	-0.669122	0	14.9718	1.6577
44	1,3-dioxolan-2-one	1,3-dioxolan-2-one	96-49-1	C3H4O3	88.06	1.321	66.7	1.42	16.87	89.78	4.51	34	261	1.84042	-0.930621	0.058646	2789.77	1.49832	1.1013	7.8023	2.033
45	1,4-cyclohexadiene	1,4-cyclohexadiene	628-41-1	C6H8	80.13	0.851	94.2	1.473	26.41	2.26	0.13	-49	89	0.545502	2.35321	122.435	2958.87	1.18873	0	12.4477	0.17525
46	1,4-dibromobenzene	1,4-dibrombenzene	106-37-6	C6H4Br2	235.91	1.832	128.8	1.574	42.51	2.57	0	89	219	2.03079	3.2593	0.160522	2661.96	1.4836	0.7761	16.2036	0
47	1,4-dibromobutane	1,4-dibromobutane	110-52-1	C4H8Br2	215.92	1.826	118.2	1.519	35.89	9.4	2.02	-20	198	1.18562	2.50308	0.864969	2291.18	0.760114	0.2184	16.2012	0.00225
48	1,4-dichlorobenzene	1,4-dichlorobenzene	106-46-7	C6H4Cl2	147	1.283	114.6	1.528	35.28	2.41	0	53	174	1.23048	2.96931	2.24519	2253.72	0.573737	0.7581	15.2854	0
49	1,4-dichlorobutane	1,4-dichlorobutane	110-56-5	C4H8Cl2	127.01	1.139	111.5	1.455	30.26	9.65	2.22	-38	153	0.884504	2.16526	6.05417	2670.83	0.540692	0.1534	15.2814	0.0093
50	1,4-difluorobenzene	p-difluorobenzene	540-36-3	C6H4F2	114.09	1.166	97.9	1.441	25.84	2.26	0	-13	89	0.652	2.19953	73.1439	2064.6	0.387808	0.7198	12.9481	0
51	1,4-dimethylbenzene	1,4-dimethylbenzene	106-42-3	C8H10	106.17	0.866	122.6	1.495	35.75	2.3	0	13	138	0.875109	3.11675	12.0599	2042.79	1.29059	0	15.9324	0
52	1,5-dichloropentane	1,5-dichloro-pentane	628-76-2	C5H10Cl2	141.04	1.1	128.2	1.457	34.92	9.92	2.33	-72	180	1.15155	2.61842	1.313	3199.05	0.686955	0.0979	17.3095	0.0284
53	1-bromo-2-chloroethane	1-bromo-2-chloroethane	107-04-0	C2H4BrCl	143.41	1.689	84.9	1.491	24.59	7.14	1.21	-18	107	0.57235	1.6058	39.5603	2229.86	-0.0827062	0.93595	11.3309	0
54	1-bromo-2-methylpropane	isobutylbromide	78-77-3	C4H9Br	137.02	1.253	109.4	1.435	28.53	7.18	1.9	-118	91	0.407565	2.64161	72.6366	2037.29	1.2301	0.04785	13.8579	0.006
55	1-bromo-3-methylbutane	1-bromo-3-methylbutane	107-82-4	C5H11Br	151.05	1.213	124.5	1.442	32.95	6.05	1.83	-112	119	0.541604	3.13277	20.1676	2227.18	1.35773	0.0647	15.8206	0.0039
56	1-bromobutane	1-bromobutane	109-65-9	C4H9Br	137.02	1.275	107.5	1.439	28.28	7.16	2.14	-112	103	0.443602	2.70458	54.27	1367.24	1.18822	0.05145	14.2175	0.0069
57	1-bromododecane	1-bromododecane	143-15-7	C12H25Br	249.23	1.038	240.1	1.458	65.52	4.07	1.95	-10	276	3.78257	6.95057	0.00568624	3855.88	2.05595	0.0526	30.1298	0.00755
58	1-bromoheptane	pyrido(2,3-b)pyrazine	629-4-9	C7H15Br	179.1	1.14	157.1	1.451	42.3	5.33	2.16	-58	178	5.82298	-0.730349	0.00427731	1859.71	0.969775	0.8643	12.6846	2.1567
59	1-bromohexane	1-bromohexane	111-25-1	C6H13Br	165.07	1.175	140.5	1.448	37.61	5.82	2.06	-85	154	0.743483	3.77335	5.51259	2427.84	1.51627	0.05235	18.1787	0.00645
60	1-bromonaphthalene	1-bromonaphthalene	90-11-9	C10H7Br	207.07	1.484	139.5	1.658	51.39	4.83	1.55	-1	281	3.31305	3.60351	0.0343392	1635.53	1.34445	0.1804	18.796	0
61	1-bromooctane	1-bromooctane	111-83-1	C8H17Br	193.13	1.112	173.7	1.453	46.94	5	1.98	-55	200	1.28503	4.84292	0.547646	2016.95	1.7548	0.0523	22.175	0.00645
62	1-bromopentane	1-bromopentane	110-53-2	C5H11Br	151.05	1.219	123.9	1.445	32.98	6.32	2.2	-95	129	0.57225	3.23892	17.4595	2531.41	1.36509	0.05055	16.1976	0.00865
63	1-bromopropane	1-bromopropane	106-94-5	C3H7Br	122.99	1.435	85.7	1.355	18.68	8.44	2.12	-110	71	0.350538	2.15709	162.596	3335.15	0.976264	0.0505	12.2196	0.00545
64	1-chloro-2,3-epoxypropane	(chloromethyl)-oxirane	106-89-8	C3H5ClO	92.52	1.175	78.8	1.438	20.68	23	2.02	-57	116	0.846593	0.510962	12.4171	2194.24	0.179327	0.6324	10.3444	0.96785
65	1-chloro-2-methylbenzene	1-chloro-2-methylbenzene	95-49-8	C7H7Cl	126.59	1.082	117	1.527	35.97	4.45	1.56	-34	159	0.986668	2.97896	5.88561	2045.37	1.08497	0.0838	15.6158	0
66	1-chloro-2-methylpropane	1-chloro-2-methyl-propane	513-36-0	C4H9Cl	92.57	0.881	105.1	1.398	25.36	6.49	2	-131	69	0.348412	2.46029	181.978	1907.44	1.20682	0.03435	13.3766	0.012
67	1-chloro-3-methylbutane	isoamylchloride	107-84-6	C5H11Cl	106.6	0.872	122.2	1.409	30.22	6.4	1.92	-104	100	0.448419	2.87676	63.6735	2044.72	1.31584	0.0485	15.1074	0.0169
68	1-chlorobutane	1-chlorobutane	109-69-3	C4H9Cl	92.57	0.886	104.5	1.402	25.44	7.39	1.9	-123	78	0.378748	2.52546	133.302	1754.96	1.16795	0.03255	13.7532	0.0158
69	1-chlorohexane	1-chlorohexane	544-10-5	C6H13Cl	120.62	0.878	137.4	1.42	34.77	5.82	1.94	-94	134	0.608618	3.59101	12.9804	2186.6	1.57986	0.0324	17.7388	0.01545
70	1-chloronaphthalene	1-chloronaphthalene	90-13-1	C10H7Cl	162.62	1.191	136.5	1.633	48.76	5	1.55	-8	259	2.63646	3.4701	0.127029	2186.6	0.970248	0.17305	18.3724	0
71	1-chlorooctane	1-chlorooctane	111-85-3	C8H17Cl	148.68	0.875	169.9	1.431	43.98	5.05	2	-58	182	1.01885	4.63202	1.30768	1927.12	1.84076	0.0347	21.718	0.01505
72	1-chloropentane	1-chloropentane	543-59-9	C5H11Cl	106.6	0.882	120.9	1.412	30.07	6.6	2.16	-99	105	0.487643	3.05859	41.8008	1565.23	1.39646	0.03145	15.7284	0.0176
73	1-chloropropane	1-chloropropane	540-54-5	C3H7Cl	78.54	0.9	87.3	1.388	20.59	8.53	2.06	-122	46	0.299161	1.97249	436.565	1876.22	0.859907	0.02845	11.7497	0.01605
74	1-dodecanol	dodecanol	112-53-8	C12H26O	186.34	0.831	224.3	1.441	59.26	6.5	1.6	26	259	31.0642	5.22972	0.00121359	2288.33	0.809541	0.7257	26.8387	1.1708
75	1-ethyl-4-methylbenzene	1-ethyl-4-methylbenzene	622-96-8	C9H12	120.19	0.866	138.7	1.493	40.32	2.24	0	-62	162	1.10961	3.62916	4.20468	1422.06	1.46946	0.0004	17.8142	0
76	1-hexanethiol	1-hexanethiol	111-31-9	C6H14S	118.24	0.844	140.1	1.449	37.61	4.44	1.55	-81	153	0.82947	3.48403	5.86225	1887.34	1.16765	0.2495	17.3923	0.69
77	1-hexene	1-hexene	592-41-6	C6H12	84.16	0.668	126	1.388	29.72	2.05	0.46	-138	63	0.340525	3.387	301.116	1794.39	2.13294	0	15.1583	0.1052
78	1-iodobutane	1-iodobutane	542-69-8	C4H9I	184.02	1.616	113.9	1.498	33.37	6.35	2.1	-103	130	0.589872	2.90234	11.2848	1885.24	1.18587	0.05545	15.0128	0
79	1-iodohexane	1-iodo-hexane	638-45-9	C6H13I	212.07	1.437	147.6	1.493	42.89	5.37	1.94	-75	180	0.921474	3.93266	1.2698	2150.61	1.49785	0.0566	18.9627	0
80	1-iodopentane	1-iodopentane	628-17-1	C5H11I	198.05	1.512	131	1.496	38.26	5.81	1.85	-86	155	0.667559	3.37188	4.02411	1822.76	1.36057	0.0564	17.0067	0
81	1-iodopropane	1-iodopropane	107-08-4	C3H7I	169.99	1.743	97.5	1.505	28.93	7.09	2.01	-101	102	0.470744	2.36976	34.2385	1966.97	0.979045	0.0549	13.0244	0
82	1-methoxy-2-methylbenzene	1-methoxy-2-methylbenzene	578-58-5	C8H10O	122.17	0.985	124	1.505	36.79	3.57	1	-34	171	1.3132	2.87873	1.75558	2414.48	0.8416	0.0268	16.3488	0.4505
83	1-methoxy-3-methylbenzene	3-methylanisole	100-84-5	C8H10O	122.17	0.972	125.7	1.513	37.78	4.08	1.17	-47	177	1.41583	2.68688	1.49208	2154.74	0.719573	0.03255	16.3927	0.54935
84	1-methoxy-4-methylbenzene	4-methylanisole	104-93-8	C8H10O	122.17	0.97	125.9	1.512	37.79	4.03	1.2	-50	175	1.41199	2.70587	1.56676	2170.93	0.718648	0.0351	16.424	0.5562
85	1-methylnaphthalene	1-methylnaphthalene	90-12-0	C11H10	142.2	1.001	142.1	1.618	49.77	2.92	0.37	-22	242	2.38665	3.40765	0.258989	2167.76	1.04286	0.02165	18.4574	0
86	1-nitropropane	1-nitropropane	108-03-2	C3H7NO2	89.09	1.001	89	1.401	21.64	23.24	3.6	-108	131	0.517231	1.34727	30.1614	2110.75	-0.0732173	0.7839	11.043	0.9056
87	1-octene	octene	111-66-0	C8H16	112.22	0.742	151.2	1.409	37.38	2.11	0.39	-102	121	0.586337	4.45235	27.0073	2692.18	2.38197	0	19.1355	0.10435
88	1-pentanethiol	1-pentanethiol	110-66-7	C5H12S	104.22	0.843	123.6	1.447	33	4.55	1.5	-76	125	0.647862	2.95268	18.7408	1655.57	0.989481	0.24635	15.3942	0.68925
89	1-pentene	pentene	109-67-1	C5H10	70.13	0.643	109.1	1.371	24.76	2.1	0.5	-162	30	0.262843	2.86439	972.536	2046.19	1.95099	0	13.2071	0.10645
90	1-phenyl-1-propanone	propiophenone	93-55-0	C9H10O	134.18	1.009	133	1.527	40.89	15.5	2.6	19	218	2.11159	2.02085	0.254957	2254.35	0.356217	0.0885	16.5759	1.31535
91	2,2,3-trimethylbutane	2,2,3-trimethylbutane	464-6-2	C7H16	100.2	0.69	145.2	1.389	34.38	1.93	0	-25	81	0.318261	3.79435	239.455	1694.43	3.09196	0	15.9158	0
92	2,2-dichloropropane	2,2-dichloropropane	594-20-7	C3H6Cl2	112.99	1.092	103.5	1.412	25.75	11.63	2.35	-34	70	0.425597	2.16208	58.8551	2224.33	0.847971	0.03735	13.2001	0
93	2,2-dimethylbutane	2,2-dimethylbutane	75-83-2	C6H14	86.18	0.649	132.8	1.369	29.96	1.87	0	-98	50	0.265969	3.48176	574.996	1772.22	3.10275	0	14.6108	0
94	2,2-dimethylpentane	2,2-dimethylpentane	590-35-2	C7H16	100.2	0.674	148.8	1.382	34.64	1.92	0	-125	79	0.351219	4.0239	167.776	1668.97	3.15034	0	16.6274	0
95	2,2-dimethylpropane	neopentane	463-82-1	C5H12	72.15	0.613	117.7	1.351	25.41	1.91	0	-17	9	0.216513	3.07859	1553.28	1867.55	3.01407	0	13.0871	0
96	2,3,4,5,6-pentafluorotoluene	n-methylpentafluorobenzene	771-56-2	C7H3F5	182.09	1.436	126.8	1.402	30.88	1.93	2.01	-30	118	0.618976	3.30894	36.1196	2232.76	2.239	0.0108	17.2901	0
97	2,3-dimethyl-1,3-butadiene	2,3-dimethyl-1,3-butadiene	513-81-5	C6H10	82.15	0.726	113.1	1.439	29.73	2.1	0	-76	69	0.320803	2.86222	377.711	2115.76	1.56095	0	14.009	0.029
98	2,3-dimethylpentane	2,3-dimethylpentane	565-59-3	C7H16	100.2	0.694	144.3	1.392	34.36	1.94	0	-135	90	0.339914	3.99742	186.019	1702.71	3.15372	0	16.4749	0
99	2,4,6-trimethyl-1,3,5-trioxane	paraldehyde	123-63-7	C6H12O3	132.16	0.994	133	1.42	33.65	13.9	1.44	13	124	2.12196	1.06902	0.479659	2087.12	0.137569	0	14.5981	2.4724
100	2,4,6-trimethylpyridine	2,4,6-collidine	108-75-8	C8H11N	121.18	0.917	132.2	1.498	38.74	12.02	2.04	43	171	1.4439	2.32067	1.02532	2062.78	0.253325	0.0111	16.7165	0.8775
101	2,4-dimethyl-3-pentanone	2,4-dimethyl-3-pentanone	565-80-0	C7H14O	114.19	0.799	142.9	1.399	34.57	17.07	2.76	-69	124	0.611644	2.03078	11.4659	1818.2	0.45931	0	15.8574	1.3097
102	2,4-dimethylaniline	2,4-dimethylaniline	95-68-1	C8H11N	121.18	0.979	123.8	1.562	40.13	4.9	1.4	-15	216	2.65548	1.94852	0.267026	2349.56	-0.517507	1.15195	15.4136	0.5479
103	2,4-dimethylpentane	2,4-dimethylpentane	108-08-7	C7H16	100.2	0.673	148.9	1.382	34.69	1.91	0	-119	81	0.359713	4.08634	155.218	1670.6	3.16772	0	16.8045	0
104	2,4-dimethylpyridine	2,4-dimethylpyridine	108-47-4	C7H9N	107.16	0.931	115.2	1.501	33.92	9.6	2.3	-60	157	1.17019	1.66575	2.76045	2309.6	0.0418591	0.02675	14.6777	0.9299
105	2,4-pentanedione	acetylacetone	123-54-6	C5H8O2	100.12	0.98	102.2	1.452	27.56	23.1	3.03	-23	140	1.03246	-0.32689	2.40317	2901.15	0.0894951	0.2185	11.5011	2.57605
106	2,6-dimethyl-4-heptanone	2,6-dimethyl-4-heptanone	108-83-8	C9H18O	142.24	0.807	176.3	1.412	43.86	9.91	2.66	-42	168	0.989242	3.14688	2.56925	1603.78	0.85423	0.00435	19.8578	1.26
107	2,6-dimethylpyridine	2,6-dimethylpyridine	108-48-5	C7H9N	107.16	0.925	115.8	1.497	33.89	7.33	1.68	-6	144	1.15829	1.80322	3.89537	2322.03	0.177131	0.03825	14.701	0.83155
108	2-(2-aminoethylamino)ethanol	2-(2-aminoethyl)aminoethanol	111-41-1	C4H12N2O	104.15	1.029	101.2	1.486	29.06	18.99	2.65	-28	240	8.25615	-0.956727	0.115146	2574.47	0.189246	1.3124	11.135	2.0433
109	2-aminoethanol	ethanolamine	141-43-5	C2H7NO	61.08	1.012	60.4	1.454	16.35	31.94	2.59	10	170	6.00234	-1.3479	2.71386	3754.78	0.653595	1.0705	7.3361	1.6713
110	2-bromobutane	2-bromobutane	78-76-2	C4H9Br	137.02	1.256	109.1	1.437	28.58	8.64	2.23	-112	91	0.417404	2.5406	64.3301	2255.01	1.17354	0.00995	13.797	0.0366
111	2-bromopropane	2-bromopropane	75-26-3	C3H7Br	122.99	1.425	86.3	1.314	16.83	9.46	2.21	-89	59	0.35629	2.01273	149.131	2566.34	0.894569	0.0173	12.0559	0.04145
112	2-butoxyethanol	2-butoxyethanol	111-76-2	C6H14O2	118.18	0.902	131	1.417	32.95	5.3	2.1	-75	171	2.23968	1.57054	1.58099	1909.25	0.252636	0.4027	15.8795	1.703
113	2-chloro-2-methylpropane	2-chloro-2-methylpropane	507-20-0	C4H9Cl	92.57	0.846	109.4	1.386	25.7	10.95	2.13	-26	50	0.355951	2.18845	161.456	2086.88	1.04284	0	12.9987	0.0904
114	2-chloroaniline	2-chloroaniline	95-51-2	C6H6ClN	127.57	1.213	105.2	1.588	35.39	13.4	1.79	-14	209	2.08311	1.68653	0.416556	2821.29	-1.15931	1.3682	13.4956	0.36955
115	2-chlorobutane	2-chlorobutane	78-86-4	C4H9Cl	92.57	0.874	105.9	1.397	25.51	8.56	2.04	-141	68	0.359164	2.38728	163.173	2077.22	1.13574	0.0046	13.3484	0.0497
116	2-cyanopyridine	2-cyanopyridine	100-70-9	C6H4N2	104.11	1.081	96.3	1.529	29.7	93.77	1.96	27	213	2.05602	0.141226	0.0419285	4285.84	1.20261	1.0035	11.7679	1.4521
117	2-ethoxyethanol	ethoxyethanol	110-80-5	C4H10O2	90.12	0.931	96.8	1.405	23.73	5.3	2.08	-70	135	1.94643	0.339072	7.82672	2385.05	-0.0326168	0.3874	11.9328	1.7137
118	2-heptanone	2-heptanone	110-43-0	C7H14O	114.19	0.82	139.3	1.408	34.35	11.95	2.59	-35	150	0.820311	1.97056	5.38149	1860.78	0.247213	0.008	16.5119	1.55245
119	2-hexanone	2-hexanone	591-78-6	C6H12O	100.16	0.807	124.1	1.401	30.15	14.56	2.69	-56	128	0.670873	1.46315	16.4563	2020.55	0.0750711	0.0072	14.5307	1.5418
120	2-iodopropane	2-iodopropane	75-30-9	C3H7I	169.99	1.703	99.8	1.499	29.31	8.19	2.09	-90	89	0.469395	2.1992	32.7084	2450.86	0.908478	0.0191	12.83	5e-05
121	2-methoxy-2-methylpropane	methyl-t-butylether	1634-04-4	C5H12O	88.15	0.741	119	1.369	26.85	4.5	1.32	-109	55	0.367514	1.74629	208.111	1950.45	0.459936	0	13.0898	0.8852
122	2-methoxyaniline	1-cis-2-trans-3-trimethylcyclopentane	90-4-0	C7H9NO	123.15	1.092	112.7	1.575	37.28	5.23	1.61	5	225	0.640029	4.1346	26.3784	1635.09	3.17105	0	17.1362	0
123	2-methoxyethanol	2-methoxyethanol	109-86-4	C3H8O2	76.1	0.965	78.9	1.402	19.21	16.93	2.04	-85	125	1.8439	-0.223727	16.417	2801.16	-0.121305	0.5408	9.66265	1.77515
124	2-methyl-1-butene	2-methyl-1-butene	563-46-2	C5H10	70.13	0.65	107.8	1.379	24.89	2.2	0.51	-137	31	0.250721	2.73333	1741.3	2076.5	1.90008	0	12.8081	0.1347
125	2-methyl-1-heptanol	2-methyl-1-heptanol	60435-70-3	C8H18O	130.23	0.799	163.1	1.422	41.43	5.15	1.62	-112	176	6.01095	3.07492	0.268252	1729.32	0.46038	0.7218	18.5243	1.03505
126	2-methyl-2-butanol	2-methyl-2-butanol	75-85-4	C5H12O	88.15	0.815	108.2	1.405	26.51	5.82	1.8	-12	102	2.13077	1.45417	12.0809	2145.82	0.263116	0.6061	12.3655	1.02185
127	2-methyl-2-phenylpropane	p-chlorobenzenesulfonica	98-06-6	C10H14	134.22	0.867	154.8	1.493	44.97	2.38	0.45	-58	169	19.2645	19.2645	0.00020046	2820.49	-5.35542	2.1975	15.1353	1.6348
128	2-methyl-2-propanamine	2-amino-2-methylpropane	75-64-9	C4H11N	73.14	0.691	105.8	1.379	24.46	4.31	1.15	-67	44	0.560499	1.12949	194.255	2189.05	-0.622845	0.46915	11.4008	0.72785
129	2-methyl-2-propanethiol	tert-butylthiol	75-66-1	C4H10S	90.19	0.799	112.9	1.422	28.73	5.48	1.59	1	64	0.426555	2.17248	97.3796	2106.42	0.775316	0.20075	12.6471	0.7217
130	2-methyl-2-propanol	tert-butanol	75-65-0	C4H10O	74.12	0.781	94.9	1.387	22.35	10.9	1.66	25	82	2.25825	0.878447	21.4742	2392.81	0.214405	0.63395	10.6225	1.099
131	2-methyl-3-heptanol	2-methyl-3-heptanol	18720-62-2	C8H18O	130.23	0.821	158.7	1.425	40.55	3.37	1.62	-85	168	3.58437	3.20921	0.76255	1698.19	0.620257	0.54035	18.4314	0.944
132	2-methylaniline	2-methyl-benzeneamine	95-53-4	C7H9N	107.16	0.999	107.3	1.573	35.35	6.34	1.3	-21	200	2.14449	1.43902	0.533335	2729.44	-0.660822	1.18265	13.5243	0.49265
133	2-methylbenzonitrile	2-methylbenzonitrile	529-19-1	C8H7N	117.15	0.99	118.4	1.528	36.45	18.5	3.77	-12	205	1.55487	1.46311	0.351051	2788.45	0.694496	0.25085	14.8807	1.13475
134	2-methylhexane	2-methylhexane	591-76-4	C7H16	100.2	0.679	147.6	1.385	34.61	1.92	0	-118	90	0.385133	4.2668	122.951	1665.48	3.18097	0	17.3056	0
135	2-methylpentane	2-methylpentane	107-83-5	C6H14	86.18	0.656	131.3	1.371	29.78	1.89	0	-154	60	0.294567	3.74391	405.178	1769.55	-1.73482	0	15.3542	0
136	2-methylpropanoic acid	isobutyricacid	79-31-2	C4H8O2	88.11	0.97	90.9	1.393	21.68	2.6	1.08	-47	155	4.4345	0.771409	2.41437	2746.43	0.234494	0.8945	10.2591	1.682
137	2-methylpropyl acetate	aceticacid-2-methylpropylester	110-19-0	C6H12O2	116.16	0.875	132.8	1.39	31.47	5.6	1.87	-99	118	0.677251	1.85303	6.69991	1954.98	0.0776618	0.0309	15.1785	1.6891
138	2-methylpropyl formate	isobutylformate	542-55-2	C5H10O2	102.13	0.876	116.6	1.386	27.39	6.41	1.88	-96	98	0.652117	1.53238	35.668	2180.91	1.56359	0.3922	13.085	1.56155
139	2-methylpropylamine	2-methyl-1-propanamine	78-81-9	C4H11N	73.14	0.735	99.6	1.397	23.98	4.4	1.15	-87	68	0.482389	1.1393	174.41	2211.16	0.0794213	0.5709	11.4266	0.8711
140	2-methylpropylbenzene	isobutylbenzene	538-93-2	C10H14	134.22	0.872	154	1.493	44.74	2.35	0.4	-51	173	1.34826	3.99684	1.82817	1761.21	0.343639	0.00385	19.2757	0
141	2-methyltetrahydrofuran	2-methyltetrahydrofuran	96-47-9	C5H10O	86.13	0.86	100.2	1.407	24.65	6.97	1.38	-136	78	0.573488	1.32456	67.7465	2057.11	0.0745438	0	12.1182	1.05215
142	2-nitroanisole	1-methoxy-2-nitrobenzene	91-23-6	C7H7NO3	153.14	1.254	122.1	1.562	39.6	43	4.83	10	272	3.16393	1.65865	0.00708214	2777.54	0.365175	0.51735	15.5943	1.55075
143	2-nitropropane	2-nitropropane	79-46-9	C3H7NO2	89.09	0.992	89.8	1.392	21.39	25.5	3.76	-93	120	0.435893	1.38682	57.7794	2596.21	0.603108	0.1483	11.4991	0.83955
144	2-nitrotoluene	2-nitrotoluene	88-72-2	C7H7NO2	137.14	1.163	118	1.547	37.43	27.4	3.7	-4	222	1.59564	2.27962	0.431788	2487.03	0.419436	0.3041	15.2965	0.8447
145	2-octanol	2-octanol	123-96-6	C8H18O	130.23	0.819	159	1.424	40.6	8.2	1.13	-32	180	6.38498	3.14008	0.251783	1711.63	-0.152289	0.6401	18.8721	1.0529
146	2-octanone	2-octanone	111-13-7	C8H16O	128.21	0.818	156.8	1.415	39.29	10.39	2.7	-16	173	1.141	2.52811	1.73405	1740.13	0.523419	0.00765	18.5003	1.5365
147	2-phenylacetonitrile	phenylacetonitrile	140-29-4	C8H7N	117.15	1.015	115.4	1.523	35.26	18.3	3.59	-24	234	2.47411	0.94945	0.0577005	3208.54	0.108339	0.95725	14.3462	1.20855
148	2-phenylethanol	2-phenylethanol	60-12-8	C8H10O	122.17	1.017	120.1	1.532	37.22	13	1.6	-27	220	10.8811	1.41754	0.0862527	2436.9	-0.799124	0.7757	15.0733	1.11245
149	2-propen-1-amine	2-propen-1-amine	107-11-9	C3H7N	57.1	0.758	75.3	1.421	19.1	5.96	1.25	-88	55	0.529624	0.293209	270.445	2994.95	-0.799124	0.66735	8.9934	0.90415
150	2-propen-1-ol	2-propen-1-ol	107-18-6	C3H6O	58.08	0.854	68	1.412	16.92	21	1.6	-129	97	2.56206	0.129763	36.9714	3482.53	-0.457541	0.74095	8.45745	1.1357
151	2-propenenitrile	2-propenenitrile	107-13-1	C3H3N	53.06	0.806	65.8	1.391	15.64	33.01	3.9	-84	78	0.451164	-0.157876	73.5668	5223.07	0.855228	0.94745	7.7847	1.09715
152	2-undecanone	2-undecanone	112-12-9	C11H22O	170.3	0.825	206.4	1.429	53.22	8.4	2.69	15	229	2.4408	4.11732	0.0578867	1479.86	0.813998	0.0101	24.4738	1.5342
153	3,3-dimethyl-2-butanone	3,3-dimethyl-2-butanone	75-97-8	C6H12O	100.16	0.807	124.1	1.397	29.89	12.73	2.75	-53	106	0.517151	1.33415	34.2095	2006.19	0.0992587	0.01345	13.4928	1.48735
154	3,3-dimethylpentane	3,3-dimethylpentane	562-49-2	C7H16	100.2	0.693	144.6	1.391	34.35	1.94	0	-135	86	0.329481	3.89801	211.661	1695.24	3.15629	0	16.1669	0
155	3,4-dimethylpyridine	3,4-dimethylpyridine	583-58-4	C7H9N	107.16	0.955	112.2	1.511	33.61	11.47	1.87	-11	164	1.14453	1.38751	2.32399	2374.04	-0.0534227	0.01965	14.2471	1.01125
156	3,6,9-trioxaundecane	1,1'-oxybis-2-ethoxy-ethane	112-36-7	C8H18O3	162.23	0.906	179.1	1.411	44.46	5.7	1.96	-44	187	1.66151	1.58489	0.0618742	1694.67	-0.00513455	0	20.9786	2.7497
157	3-bromoaniline	3-bromoaniline	591-19-5	C6H6BrN	172.02	1.579	108.9	1.626	38.56	13	2.99	18	251	3.21165	1.69174	0.0295429	3275.27	-1.15652	1.6675	13.9078	0.39795
158	3-bromopentane	3-bromopentane	1809-10-5	C5H11Br	151.05	1.211	124.7	1.443	33.07	8.37	2.29	-126	118	0.497198	3.06968	27.5439	2039.31	1.44474	0.00465	15.5388	0.04145
159	3-bromopropene	3-bromopropene	106-95-6	C3H5Br	120.98	1.398	86.5	1.47	24.14	7	1.4	-119	71	0.443719	1.7622	87.557	3192.83	0.590276	0.2922	11.5666	0.0002
160	3-bromopyridine	3-bromopyridine	626-55-1	C5H4BrN	158	1.617	97.7	1.57	32.06	9.85	1.99	-27	173	1.539	1.42374	1.13622	3424.05	0.892662	0.6012	12.7651	0.7827
161	3-chloroaniline	3-chlorobenzeneamine	108-42-9	C6H6ClN	127.57	1.214	105.1	1.594	35.66	13.4	2.43	-10	230	2.65078	1.50566	0.102176	2932.79	-1.48446	1.6568	13.407	0.3971
162	3-chloropropene	3-chloropropene	107-05-1	C3H5Cl	76.53	0.94	81.4	1.416	20.43	8.2	1.94	-135	45	0.375986	1.56249	278.803	2808.84	0.222217	0.22955	11.1208	0.0011
163	3-chlorotoluene	3-chlorotoluene	108-41-8	C7H7Cl	126.59	1.072	118.1	1.522	36.01	5.55	1.6	-48	162	1.0432	3.04046	3.83689	2172.55	1.04499	0.1255	15.8857	0
164	3-ethylpentane	3-ethylpentane	617-78-7	C7H16	100.2	0.699	143.4	1.394	34.28	1.94	0	-119	93	0.342263	4.01236	185.325	1693.94	3.21854	0	16.4778	0
165	3-heptanol	3-heptanol	589-82-2	C7H16O	116.2	0.817	142.2	1.42	35.99	6.86	1.71	-70	157	3.46958	2.65798	1.24287	1821.73	0.536872	0.6239	16.8559	0.93285
166	3-heptanone	3-heptanone	106-35-4	C7H14O	114.19	0.818	139.6	1.409	34.49	12.9	2.78	-37	147	0.757968	2.10434	7.48046	1851.39	0.346759	0	16.5312	1.40455
167	3-isothiocyanatopropene	dmtt(dazomet)	57-6-7	C4H5NS	99.16	1.017	97.5	1.527	29.97	17.2	3.3	-102	154	7.93294	0.72649	4.543e-05	2957.82	0.720432	0.92265	15.1459	2.1104
168	3-methyl-1-butanol	isopentanol	123-51-3	C5H12O	88.15	0.81	108.8	1.401	26.46	15.2	1.7	-134	130	3.86769	1.40088	4.47413	2211.51	0.188814	0.71765	12.5135	1.18165
169	3-methyl-2-butanone	3-methyl-2-butanone	563-80-4	C5H10O	86.13	0.804	107.1	1.388	25.28	16.57	2.79	-92	94	0.464674	0.920005	67.5776	2212.99	-0.124817	0.01385	12.2245	1.487
170	3-methylaniline	3-methylaniline	108-44-1	C7H9N	107.16	0.999	107.3	1.567	35.04	5.95	1.3	-44	203	2.50559	1.39807	0.401555	2731.64	-0.804624	1.3544	13.521	0.5282
171	3-methylbutanoic acid	isovalericacid	503-74-2	C5H10O2	102.13	0.925	110.4	1.403	26.96	2.6	0.63	-29	176	5.57157	1.25617	1.39214	2430.92	-1.75886	0.91295	12.0834	1.73125
172	3-methylhexane	3-methyl-hexane	589-34-4	C7H16	100.2	0.69	145.2	1.389	34.33	1.93	0	-119	92	0.345813	4.17306	142.736	1685.06	3.20837	0	17.1037	0
173	3-methylphenol	3-hydroxytoluene	108-39-4	C7H8O	108.14	1.034	104.6	1.54	32.8	11.5	1.6	11	203	5.49174	1.85285	0.281335	2713.09	-4.02889	0.94055	13.3774	0.6924
174	3-methylpyridine	3-picoline	108-99-6	C6H7N	93.13	0.957	97.4	1.507	28.97	11.1	2.41	-18	144	0.952539	1.0426	7.44794	2689.46	-0.02197	0.0664	12.5905	0.95755
175	3-octanol	3-octanol	589-98-0	C8H18O	130.23	0.818	159.3	1.421	40.39	7.03	1.74	-45	175	4.20462	3.22803	0.465655	1698.18	0.666398	0.62405	18.9219	0.92915
176	3-pentanone	3-pentanone	96-22-0	C5H10O	86.13	0.815	105.7	1.392	25.17	17.3	2.7	-39	101	0.485966	1.05784	66.2926	2215.52	-0.0746603	0	12.556	1.415
177	4,N,N-trimethylaniline	n,n,4-trimethylaniline	99-97-8	C9H13N	135.21	0.937	144.4	1.547	45.77	3.9	1.23	-25	211	1.67751	3.35353	0.480875	1944.94	1.0123	0.00805	18.6688	0.2581
178	4-chlorotoluene	1-chloro-4-methylbenzene	106-43-4	C7H7Cl	126.59	1.071	118.2	1.521	35.99	6.08	2.21	7	162	1.04065	3.02387	3.98088	2176.29	0.99587	0.14265	15.8236	0
179	4-ethylpyridine	4-ethylpyridine	536-75-4	C7H9N	107.16	0.941	113.9	1.502	33.61	10.98	2.65	-91	167	1.18569	1.51904	2.73307	2331.27	0.00678151	0.06525	14.4577	0.9796
180	4-fluorotoluene	4-fluorotoluene	352-32-9	C7H7F	110.13	0.998	110.4	1.469	30.73	5.86	2	-57	116	0.740182	2.6828	27.0704	2303.09	0.942982	0.15045	14.661	0
181	4-heptanol	4-heptanol	589-55-9	C7H16O	116.2	0.815	142.6	1.418	35.94	6.17	1.7	-42	155	3.10552	2.70127	0.844992	1811.59	0.529954	0.62565	16.9192	0.9301
182	4-heptanone	4-heptanone	123-19-3	C7H14O	114.19	0.815	140.1	1.407	34.49	12.6	2.68	-33	144	0.574017	2.20968	9.19411	1835.74	0.457633	0	16.547	1.43535
183	4-methoxyaniline	p-anisidine	104-94-9	C7H9NO	123.15	1.061	116.1	1.556	37.32	8.84	1.8	57	246	4.55839	0.86297	0.0301648	2964.45	-0.264798	1.35485	13.9602	1.1678
184	4-methyl-1,3-pentadiene	4-methyl-1,3-pentadiene	926-56-7	C6H10	82.15	0.719	114.3	1.45	30.73	2.6	0.52	-70	76	0.36585	2.86669	233.046	2128.2	1.32574	0.003	14.4875	0.0623
185	4-methyl-3-heptanol	4-methyl-3-heptanol	14979-39-6	C8H18O	130.23	0.794	164	1.418	41.32	5.25	1.23	-123	170	3.47403	3.15419	1.05323	1711.92	0.561448	0.65725	17.9564	0.92715
186	4-methyl-3-penten-2-one	4-methyl-3-penten-2-one	141-79-7	C6H10O	98.14	0.858	114.4	1.444	30.39	15.1	3.28	-59	130	0.609532	1.22739	17.7276	2245.18	-0.0211369	0.00385	13.7668	1.4902
187	4-methylaniline	4-methylaniline	106-49-0	C7H9N	107.16	0.954	112.3	1.553	35.96	4.98	1.38	45	200	2.51881	1.40676	0.439773	2699.71	-0.777874	1.3409	13.5852	0.5098
188	4-methylpentanenitrile	4-methylpentanitrile	542-54-1	C6H11N	97.16	0.803	121	1.406	29.72	15	3.53	-51	154	0.704899	1.232	5.20298	2296.36	0.221425	0.3166	14.1662	1.3696
189	4-methylpyridine	4-methylpyridine	108-89-4	C6H7N	93.13	0.957	97.3	1.505	28.86	12.28	2.7	4	145	0.961511	0.990894	6.77895	2684	-0.0964321	0.05915	12.5787	0.97875
190	4-nitroanisole	p-nitroanisole	100-17-4	C7H7NO3	153.14	1.219	125.6	1.571	41.25	27.98	5.26	54	259	3.09988	1.9173	0.0108005	2684.05	0.196127	0.7272	15.6329	1.4016
191	4-octanol	octan-4-ol	589-62-8	C8H18O	130.23	0.815	159.7	1.423	40.65	5.12	1.15	-41	177	3.95704	3.26825	0.507733	1691.11	0.699224	0.62465	18.8883	0.93185
192	5-nonanone	5-nonanone	502-56-7	C9H18O	142.24	0.818	173.9	1.42	44	10.6	2.71	-50	188	0.94996	3.18727	1.10114	1618.72	0.728101	0	20.4354	1.4157
193	acenaphthene	acenaphthene	83-32-9	C12H10	154.21	1.024	150.6	1.605	51.84	3	0.93	94	277	3.13478	3.53191	0.0981611	2008.75	1.06441	0.0092	19.0233	0
194	acetaldoxime	acetaldehydeoxime	107-29-9	C2H5NO	59.07	0.97	60.9	1.426	15.61	3.4	0.75	45	115	3.86621	-0.165275	15.471	4240.85	-1.05617	0.88275	7.52835	1.5044
195	acetic acid	aceticacid	64-19-7	C2H4O2	60.05	1.051	57.1	1.372	12.99	6.2	1.68	17	118	3.53907	-0.470835	6.35927	4568.48	-1.24171	0.9527	6.42235	1.88885
196	acetic anhydride	aceticanhydride	108-24-7	C4H6O3	102.09	1.082	94.4	1.39	22.37	20	2.8	-73	139	0.78187	0.354471	1.60262	3069.35	0.0668055	0.37805	11.2705	2.19775
197	acetophenone	acetophenone	98-86-2	C8H8O	120.15	1.024	117.3	1.533	36.39	17.4	3.05	20	202	1.81691	1.34388	0.472482	2574.02	0.259207	0.12185	14.5751	1.45805
198	acetyl chloride	acetylchloride	75-36-5	C2H3ClO	78.5	1.104	71.1	1.39	16.85	15.8	2.72	-112	52	0.35774	1.21269	245.563	3249.52	-0.391152	0.6953	9.4745	0.1419
199	aniline	aniline	62-53-3	C6H7N	93.13	1.022	91.1	1.583	30.45	6.7	1.51	-6	184	2.04344	2.04344	0.873344	3324.26	-0.859399	1.39125	11.632	0.4657
200	anthracene	anthracene	120-12-7	C14H10	178.23	1.25	142.6	1.595	48.44	2.35	0	218	340	6.88988	6.88988	0.873344	2094.78	0.91836	0.0711	21.4886	0
201	benzaldehyde	benzaldehyde	100-52-7	C7H6O	106.12	1.042	101.9	1.546	32.28	17.8	2.89	-26	178	1.42402	1.42402	0.00444478	2922.69	0.304511	0.13245	12.9493	1.4077
202	benzene	benzene	71-43-2	C6H6	78.11	0.879	88.9	1.501	26.2	2.28	0	6	80	0.583142	0.583142	1.79391	2696.49	0.83034	0.01595	12.1212	0
203	benzoyl chloride	benzoylchloride	98-88-4	C7H5ClO	140.57	1.212	116	1.554	37.15	23	3.26	-1	197	1.3701	1.3701	0.477111	2454.19	0.594539	0.3198	15.6252	0.2542
204	benzyl acetate	aceticacidphenylmethylester	140-11-4	C9H10O2	150.18	1.057	142.1	1.523	43.4	5.1	1.22	-51	214	2.95684	2.95684	0.0632549	2268.05	0.308295	0.0966	17.7945	1.7594
205	benzyl alcohol	benzylalcohol	100-51-6	C7H8O	108.14	1.044	103.6	1.54	32.5	13	1.71	-15	205	9.42859	9.42859	0.109432	2777.1	-0.568444	0.73245	13.3052	1.0565
206	benzyl chloride	(chloromethyl)-benzene	100-44-7	C7H7Cl	126.59	1.1	115.1	1.539	36.05	7	1.82	-39	179	1.6368	1.6368	0.893156	2441.54	0.413966	0.31925	15.6817	0.0027
207	benzylamine	benzylamine	100-46-9	C7H9N	107.16	0.982	109.2	1.544	34.45	4.6	1.1	10	185	1.66812	1.66812	1.0559	2545.61	-0.290383	0.6092	14.0501	0.7874
208	biphenyl	biphenyl	92-52-4	C12H10	154.21	0.99	155.8	1.614	54.31	2.53	0	69	255	4.31842	4.31842	0.0343379	2176.26	0.974295	0.0477	19.877	0
209	bis(2-chloroethyl) ether	bis(2-chloroethyl)ether	111-44-4	C4H8Cl2O	143.01	1.219	117.3	1.457	31.95	20.79	2.43	-50	178	1.30252	1.30252	0.335374	2506.93	0.3438	0.5228	15.6233	0.67045
210	bromobenzene	bromobenzene	108-86-1	C6H5Br	157.01	1.492	105.2	1.559	33.98	5.4	1.55	-31	156	1.08197	1.08197	3.16909	2853.99	1.25637	0.2076	14.3755	0
211	bromocyclohexane	bromocyclohexane	108-85-0	C6H11Br	163.06	1.336	122	1.495	35.59	7.92	2.2	-57	164	0.969865	0.969865	3.13884	1979.7	1.34053	0.00825	15.5515	0.04985
212	bromoethane	bromoethane	74-96-4	C2H5Br	108.97	1.47	74.1	1.425	18.95	4.9	2.04	-119	38	0.300775	0.300775	419.808	3098.89	0.69058	0.0671	10.2577	0.0114
213	bromotrichloromethane	bromotrichloromethane	75-62-7	CBrCl3	198.27	2	99.1	1.506	29.45	2.47	0.4	-6	105	0.447584	0.447584	43.9498	2554.01	2.84616	0.05725	13.8772	0
214	butanal	butanal	123-72-8	C4H8O	72.11	0.811	88.9	1.394	21.28	13.4	2.72	-96	75	0.394267	0.394267	266.201	2511.88	-0.166426	0.00695	10.7516	1.4099
215	butane	butane	106-97-8	C4H10	58.12	0.579	100.4	1.333	20.63	1.77	0	-138	-1	0.18213	0.18213	4055.42	2045.85	3.07113	0	11.7502	0
216	butanenitrile	butyronitrile	109-74-0	C4H7N	69.11	0.795	86.9	1.384	20.31	20.7	4.07	-112	118	0.459211	0.459211	34.1451	3008.39	0.0862601	0.28715	10.6019	1.36345
217	butanethiol	butanethiol	109-79-5	C4H10S	90.19	0.842	107.2	1.443	28.38	4.95	1.53	-116	98	0.502602	0.502602	58.7719	2109.26	0.757688	0.2506	13.3911	0.6949
218	butanoic acid	butyricacid	107-92-6	C4H8O2	88.11	0.96	91.8	1.398	22.16	2.8	1.65	-8	164	4.89512	4.89512	1.81737	2809.86	-1.6331	0.8967	10.458	1.7777
219	butanol	1-butanol	71-36-3	C4H10O	74.12	0.81	91.5	1.399	22.16	17.51	1.75	-90	118	2.91697	2.91697	11.7743	2443.75	0.153364	0.73905	10.9424	1.1477
220	butoxybenzene	butylphenylether	1126-79-0	C10H14O	150.22	0.934	160.8	1.497	47.06	3.73	1.19	-19	208	2.30542	2.30542	0.168223	1810.09	1.04888	0.0384	20.5123	0.53525
221	butylamine	1-butylamine	109-73-9	C4H11N	73.14	0.74	98.8	1.401	24.01	5.4	1	-49	77	0.491562	0.491562	153.764	2208.19	-0.459407	0.57435	11.7539	0.8735
222	carbon disulfide	cs2	75-15-0	CS2	76.14	1.26	60.4	1.628	21.44	2.64	0	-112	46	0.246222	0.246222	1506	3637.88	3.22026	0	9.9513	0
223	chlorobenzene	chlorobenzene	108-90-7	C6H5Cl	112.56	1.106	101.8	1.525	31.18	5.62	1.54	-45	132	0.856303	0.856303	7.53059	2482.15	0.74865	0.21105	13.8897	0
224	chlorocyclohexane	chlorocyclohexane	542-18-7	C6H11Cl	118.61	0.989	119.9	1.462	32.97	7.6	2.19	-44	142	0.840778	0.840778	3.05967	1854.1	1.41344	0.0046	15.0875	0.0528
225	cis-1,2-dichloroethene	cis-1,2-dichloroethene	156-59-2	C2H2Cl2	96.94	1.282	75.6	1.446	20.17	9.2	2.95	-80	60	0.319332	0.319332	4.61571	2768.39	-0.790454	1.1748	9.9791	0
226	cis-decalin	cis-decalin	493-01-6	C10H18	138.25	0.897	154.1	1.48	43.78	2.23	0	-43	193	1.27577	1.27577	28.6952	1541.19	3.20572	0	18.1693	0
227	cumene	isopropylbenzene	98-82-8	C9H12	120.19	0.857	140.3	1.491	40.62	2.38	0.65	-96	151	1.1022	1.1022	9.85737	1920.88	1.38957	0.0041	17.5364	0
228	cycloheptatriene	cycloheptatriene	544-25-2	C7H8	92.14	0.887	103.9	1.517	31.43	2.54	0.25	-80	116	0.785568	0.785568	253.739	2282.3	0.924824	0.0015	13.6582	0.09195
229	cyclohexanamine	cyclohexylamine	108-91-8	C6H13N	99.18	0.865	114.7	1.459	31.35	4.43	1.31	-18	135	1.28894	1.28894	9.85737	1968.52	-0.310756	0.48905	13.2927	0.78665
230	cyclohexanecarboxylic acid	cyclohexanecarboxylicacid	98-89-5	C7H12O2	128.17	1.025	125	1.454	33.84	2.67	0.9	31	233	13.3237	13.3237	0.0563686	2131.02	-1.45832	0.89365	13.7879	1.7457
231	cyclohexanol	cyclohexanol	108-93-0	C6H12O	100.16	0.949	105.5	1.465	29.18	15	1.85	26	161	6.07627	6.07627	0.928792	2135.52	0.384936	0.69065	12.4213	1.1381
232	cyclohexene	cyclohexene	110-83-8	C6H10	82.15	0.811	101.3	1.447	27.06	2.22	0.33	-104	83	0.474133	2.73714	178.453	1990.16	2.01795	0	12.7905	0.18845
233	cyclohexyl acetate	aceticacidcyclohexylester	622-45-7	C8H14O2	142.2	0.97	146.6	1.442	38.79	5.08	1.9	-65	172	1.5589	2.30734	0.559664	1790.26	0.415413	0.0283	16.9292	1.7335
234	cyclooctane	cyclooctane	292-64-8	C8H16	112.22	0.834	134.6	1.459	36.78	2.12	0	15	149	0.782769	3.86468	19.579	1645.04	3.18705	0	16.2083	0
235	cyclooctatetraene	1,3,5,7-cyclooctatetraene	629-20-9	C8H8	104.15	0.918	113.5	1.538	35.49	2.46	0.07	-5	141	1.18058	2.49553	6.04354	2308	0.781342	0.00475	14.7395	0.20695
236	cyclopentane	cyclopentane	287-92-7	C5H10	70.13	0.745	94.1	1.406	23.13	1.84	0	-94	49	0.32371	2.81128	737.308	1967.04	3.00894	0	11.9909	0
237	cyclopentanone	cyclopentanone	120-92-3	C5H8O	84.12	0.95	88.5	1.437	23.2	14.45	3.28	-58	131	0.710866	0.330713	23.4949	2406.25	-0.375366	0.0049	10.7803	1.66315
238	d-carvone	carvon	99-49-0	C10H14O	150.22	0.961	156.3	1.497	45.74	11	3.17	89	230	2.69787	2.01183	0.0596045	1901.68	0.177782	0.0146	18.3916	1.6312
239	decane	n-decane	124-18-5	C10H22	142.28	0.73	194.9	1.408	48.08	1.95	0.07	-30	174	0.945738	5.99333	2.92652	1437.47	3.28305	0	23.6676	0
240	decanol	1-decanol	112-30-1	C10H22O	158.28	0.83	190.8	1.437	49.98	8.1	1.6	6	233	15.9167	4.152	0.0136877	1555.09	0.724257	0.72545	22.8473	1.17155
241	di-n-butyl sulfide	di-n-butylsulfide	544-40-1	C8H18S	146.3	0.839	174.4	1.453	47.13	4.41	1.59	-80	189	0.929767	4.36113	1.05884	1616.11	1.69476	0	21.1341	0.7955
242	dibenzofuran	dibenzofuran	132-64-9	C12H8O	168.19	1.089	154.5	1.608	53.42	3	0.86	82	285	4.71004	3.6936	0.0238892	2214.21	0.869549	0.22615	19.4983	0.11
243	dibenzyl ether	dibenzylether	103-50-4	C14H14O	198.26	1.044	189.9	1.561	61.5	3.86	1.39	3	297	9.25594	3.73203	0.00043484	1885.65	0.633824	0.04465	24.7505	0.83395
244	dibromomethane	ch2br2	74-95-3	CH2Br2	173.83	2.495	69.7	1.541	21.88	7.8	1.78	-53	97	0.502125	1.63906	44.8406	4397.27	-0.148911	1.3282	9.569	0
245	dibutyl decandioate	decanedioicaciddibutylester	109-43-3	C18H34O4	314.47	0.941	334.2	1.443	88.55	4.54	2.64	-10	349	40.8279	6.45347	2.5445e-07	1203.17	0.661018	0.0025	39.3178	3.3541
246	dibutyl ether	di-n-butylether	142-96-1	C8H18O	130.23	0.769	169.4	1.397	40.78	3.1	1.18	-95	142	0.571344	4.04574	6.20918	1580.72	1.84109	0	20.0194	0.9438
247	dibutyl phthalate	dibutylphthalate	84-74-2	C16H22O4	278.35	1.043	266.9	1.493	77.56	6.44	2.83	-35	340	22.9351	4.62065	4.8887e-06	1476.43	0.472685	0.21175	30.982	2.6185
248	dibutylamine	dibutylamine	111-92-2	C8H19N	129.25	0.767	168.5	1.415	42.23	3.2	0.98	-62	160	0.603714	3.97314	4.67102	1578.86	1.33544	0.2345	20.3942	0.66025
249	dichloromethane	ch2cl2	75-09-2	CH2Cl2	84.93	1.326	64.1	1.424	16.35	8.93	1.14	-97	39	0.32235	1.22897	483.808	3060.21	-1.61182	1.40415	8.44225	0
250	diethanolamine	diethanolamine	111-42-2	C4H11NO2	105.14	1.097	95.8	1.478	27.13	25.75	2.79	29	270	18.4717	-0.704377	0.0189154	2706.03	0.502254	1.0711	11.5146	2.39085
251	diethyl (2E)-2-butenedioate	2,4,4-trimethyl-2-pentanethiol	141-5-9	C8H12O4	172.18	1.052	163.7	1.441	43.22	6.56	2.39	0	214	0.859236	3.70428	3.38988	1618.17	1.47015	0.15635	18.5905	0.6306
252	diethyl (2Z)-2-butenedioate	diethylmaleate	141-05-9	C8H12O4	172.18	1.066	161.5	1.44	42.57	8.58	2.55	-11	220	2.75582	1.728	0.0152427	2098.59	0.070342	0.68835	18.2156	2.88215
253	diethyl butanedioate	ethylsuccinate	123-25-1	C8H14O4	174.2	1.042	167.2	1.42	42.31	6.64	2.17	-21	218	2.54407	1.79124	0.0189706	1924.79	0.0897398	0.1015	19.34	3.0051
254	diethyl disulfide	diethyldisulfide	110-81-6	C4H10S2	122.26	0.988	123.7	1.507	36.82	15.9	2.01	-102	152	0.706378	3.0929	5.78512	2095.96	1.19965	0.0239	16.0465	0.27095
255	diethyl oxalate	ethyloxalat	95-92-1	C6H10O4	146.14	1.079	135.4	1.41	33.56	8.1	2.54	-40	183	1.53125	1.29655	0.436347	2253.69	0.0216283	0.22485	16.0048	2.79995
256	diethyl propanedioate	diethylmalonate	105-53-3	C7H12O4	160.17	1.055	151.8	1.414	37.94	7.87	2.57	-50	197	2.66265	1.39982	0.0362785	2118.58	0.0210512	0.59985	17.2441	3.03605
257	diethyl sulfide	diethylsulfide	352-93-2	C4H10S	90.19	0.835	108	1.442	28.58	7.2	1.52	-104	91	0.450187	2.18784	80.9904	2187.65	0.942113	0	13.1209	0.8385
258	diethylamine	diethylamine	109-89-7	C4H11N	73.14	0.702	104.2	1.386	24.49	3.92	0.92	-50	55	0.417065	1.79954	318.203	2101.74	0.0251118	0.23375	12.4684	0.65975
259	diethylene glycol	diethyleneglycol	111-46-6	C4H10O3	106.12	1.118	94.9	1.445	25.26	31.7	2.31	-8	245	19.3293	-0.948255	0.0269343	2968.53	0.525789	0.8662	11.3566	2.4605
260	diiodomethane	diiodomethane	75-11-6	CH2I2	267.83	3.322	80.6	1.74	32.52	5.3	1.15	6	181	0.842858	1.98676	2.21338	3461.91	-0.265535	1.2379	11.3055	0
261	diisopropyl sulfide	2,4-dimethyl-3-thiapentane	625-80-9	C6H14S	118.24	0.814	145.3	1.439	38.17	5.81	1.67	-106	120	0.666899	3.11425	10.7124	1831.48	1.33832	0	16.5499	0.8399
262	diisopropylamine	diisopropylamine	108-18-9	C6H15N	101.19	0.71	142.5	1.392	33.94	3.04	1.2	-61	84	0.527187	2.7928	45.99	1790.08	0.580743	0.14945	15.7875	0.5737
263	dimethoxymethane	dimethoxymethane	109-87-5	C3H8O2	76.1	0.86	88.5	1.353	19.19	2.7	0.91	-105	42	0.37818	0.40639	395.841	2508.92	-0.271235	0	10.2978	1.6114
264	dimethyl disulfide	dimethyldisulfide	624-92-0	C2H6S2	94.2	1.056	89.2	1.525	27.34	9.77	1.99	-85	110	0.51984	2.05001	28.6878	2688.21	0.720582	0.1069	12.4124	0.35555
265	dimethyl phthalate	dimethylphthalate	131-11-3	C10H10O4	194.19	1.19	163.2	1.515	49.21	8.5	2.66	2	283	7.36674	1.7059	0.00073224	2283.88	0.244247	0.3044	19.1753	2.55935
266	dimethyl propanedioate	dimethylmalonate	108-59-8	C5H8O4	132.12	1.119	118.1	1.42	29.88	10.3	1.52	-62	179	2.0307	0.515603	0.458341	2728.4	0.0930914	0.65475	13.3733	2.7548
267	dimethyl sulfate	dimethylsulfate	77-78-1	C2H6O4S	126.13	1.322	95.4	1.386	22.41	50.28	4.02	-32	188	0.95787	1.34031	1.64941	3060.39	0.0131423	0.5846	12.315	1.0096
268	dimethyl sulfide	dimethylsulfide	75-18-3	C2H6S	62.14	0.842	73.8	1.435	19.26	6.3	1.5	-83	38	0.297274	1.24355	625.895	2746.48	0.385607	0.0118	9.6228	0.7663
269	dimethylcyanamide	dimethylcyanamide	1467-79-4	C3H6N2	70.09	0.88	79.7	1.41	19.73	37.23	4.77	-41	162	0.552916	-1.04463	4.23487	3407.19	-0.0893343	0.13865	9.67515	1.9958
270	dioxane	dioxane	123-91-1	C4H8O2	88.11	1.034	85.2	1.422	21.68	2.25	0.45	12	101	0.955579	-0.146457	22.5556	2604.65	-0.321914	0.0004	10.1765	1.86395
271	dipentyl ether	di-n-pentylether	693-65-2	C10H22O	158.28	0.785	201.6	1.412	50.17	3.1	1.2	-69	188	1.04888	5.09181	0.546115	1442.43	2.02344	0	24.0219	0.9435
272	diphenyl ether	diphenylether	101-84-8	C12H10O	170.21	1.08	157.6	1.579	52.38	3.9	1.17	25	257	5.65923	3.85308	0.0108827	2108.01	0.896541	0.1656	20.7733	0.25005
273	diphenylmethane	diphenylmethane	101-81-5	C13H12	168.24	1.006	167.2	1.575	55.26	2.61	0.26	91	263	5.87495	3.89905	0.0108827	1985.88	0.912798	0.017	21.8831	0
274	dipropyl ether	di-n-propylether	111-43-3	C6H14O	102.18	0.7	146	1.381	33.89	3.39	1.12	-122	90	0.321366	3.01796	32.3679	1770.86	1.62682	0	16.1013	0.94215
275	dipropylamine	dipropylamine	142-84-7	C6H15N	101.19	0.74	136.7	1.405	33.52	2.9	1.04	-63	245	0.406077	2.93732	32.865	1768.23	1.01053	0.2403	16.4054	0.65855
276	dodecane	dodecane	112-40-3	C12H26	170.34	0.749	227.4	1.422	57.74	2	0.07	-10	216	1.53431	7.03851	0.283652	1336.65	3.28575	0	27.6455	0
277	ethanediol	glycol	107-21-1	C2H6O2	62.07	1.115	55.7	1.429	14.35	37.7	2.27	-13	198	13.5514	-1.33795	0.220637	4546.93	1.02581	1.27645	6.4309	2.04575
278	ethanethiol	ethanethiol	75-08-1	C2H6S	62.14	0.862	72.1	1.432	18.69	6.9	1.57	-148	35	0.322069	1.30418	544.325	2776.95	0.14019	0.25925	9.39725	0.6953
279	ethanol	ethanol	64-17-5	C2H6O	46.07	0.789	58.4	1.361	12.93	24.55	1.66	-114	78	2.46975	-0.218615	57.8295	3519.08	0.0523407	0.74305	6.92585	1.1499
280	ethoxybenzene	ethoxybenzene	103-73-1	C8H10O	122.17	0.967	126.3	1.507	37.6	4.22	1.41	-30	170	1.4405	2.77107	1.35252	2175.98	0.755722	0.03665	16.5167	0.5445
281	ethyl 2-hydroxypropanoate	2-hydroxypropanoicacidethylester	97-64-3	C5H10O3	118.13	1.03	114.7	1.415	28.72	13.1	2.55	-26	154	1.49403	0.969159	1.80496	2237.29	-0.216735	0.3218	13.6176	2.0548
282	ethyl 3-oxobutanoate	ethylacetoacetate	141-97-9	C6H10O3	130.14	1.028	126.6	1.419	31.97	15.7	2.96	-43	180	1.57678	0.419982	0.239694	2477.98	0.0744023	0.5574	14.2154	2.86255
283	ethyl acetate	ethylacetate	141-78-6	C4H8O2	88.11	0.901	97.8	1.372	22.26	6.02	1.88	-84	77	0.456615	0.78447	71.1785	2450.55	-0.213165	0.0311	11.5144	1.7997
284	ethyl benzoate	ethylbenzoate	93-89-0	C9H10O2	150.18	1.05	143	1.505	42.42	6	2	-34	212	2.03522	2.62861	0.137404	2131.28	0.5031	0.0524	17.7262	1.4037
285	ethyl butanoate	ethylbutyrate	105-54-4	C6H12O2	116.16	0.879	132.2	1.392	31.47	5.1	1.76	-93	120	0.673134	1.92427	10.2046	1955.52	0.259767	5e-05	15.5816	1.69555
286	ethyl chloroacetate	ethylchloroacetate	105-39-5	C4H7ClO2	122.55	1.159	105.7	1.421	26.81	12.78	2.65	-27	143	1.11104	1.25871	1.6522	2576.15	-0.0704757	1.0723	12.7948	1.482
287	ethyl cyanoacetate	cyanoaceticacidethylester	105-56-6	C5H7NO2	113.12	1.063	106.4	1.418	26.82	26.9	4.04	-23	207	2.31903	-0.0663941	0.0552458	3626.31	0.60272	1.65045	11.8809	2.25665
288	ethyl formate	ethylformate	109-94-4	C3H6O2	74.08	0.917	80.8	1.359	17.78	8.4	1.94	-80	54	0.455085	0.365572	223.135	2979.07	-0.282193	0.391	9.2733	1.6713
289	ethyl hexanoate	ethylhexanoate	123-66-0	C8H16O2	144.21	0.871	165.6	1.407	40.76	4.57	1.6	-67	168	1.06122	3.05002	0.827594	1696.84	0.627392	0.00275	19.5008	1.72065
290	ethyl isothiocyanate	ethylisothiocyanate	542-85-8	C3H5NS	87.15	1	87.1	1.51	26.06	19.5	3.31	-5	131	0.486645	1.95149	30.3895	2947.44	0.715766	0.06375	13.0397	0.0041
291	ethyl nitrate	ethylnitrate	625-58-1	C2H5NO3	91.07	1.108	82.2	1.385	19.28	19.4	2.41	-95	88	0.353776	2.01336	396.322	2562.71	-0.328406	0.4261	11.4197	0.1522
292	ethyl propanoate	ethylpropionate	105-37-3	C5H10O2	102.13	0.892	114.5	1.384	26.77	5.65	1.74	-73	98	0.52281	1.46314	20.5624	2148.08	0.0820322	0.0014	13.5282	1.6981
293	ethyl salicylate	ethyl-2-hydroxybenzoate	118-61-6	C9H10O3	166.18	1.131	146.9	1.522	44.81	8.6	2.88	1	233	2.06513	3.30445	0.038593	2020.12	0.537135	0.20215	18.3231	1.25485
294	ethyl thiocyanate	ethylthiocyanate	542-90-5	C3H5NS	87.15	1.012	86.1	1.462	23.67	29.3	3.64	-86	146	0.568153	0.67306	8.10439	3348.14	0.460358	0.42065	11.0957	1.10985
295	ethylbenzene	ethylbenzene	100-41-4	C8H10	106.17	0.867	122.5	1.493	35.59	2.41	0.58	-94	136	0.889646	3.08175	12.3219	2072.54	1.24824	0.0058	15.8962	0
296	ethynylbenzene	ethynylbenzene	536-74-3	C8H6	102.14	0.937	109	1.548	34.62	2.99	0.66	-45	143	1.24802	2.51416	3.05842	2781.49	0.023547	0.6854	14.5332	0.00205
297	fluorobenzene	fluorobenzene	462-06-6	C6H5F	96.1	1.025	93.8	1.465	25.92	5.55	1.66	-40	85	0.61583	2.15018	80.4392	2675.85	0.691456	0.19685	12.731	0
298	formamide	formamide	75-12-7	CH3NO	45.04	1.133	39.8	1.447	10.62	84	3.71	2	210	4.61799	-2.68679	0.0748657	12709.9	4.02328	1.8198	3.9541	1.9137
299	formic acid	formicacid	64-18-6	CH2O2	46.03	1.22	37.7	1.37	8.53	58.5	1.42	8	101	2.89723	-0.898528	17.0172	7808.98	-2.26534	1.5164	4.03805	1.67675
300	furan	1-ethynylcyclohexanol	110-0-9	C4H4O	68.08	0.936	72.7	1.42	18.41	2.9	0.69	-86	31	7.93508	1.88885	554	2178.72	-0.99143	1.2608	14.4438	1.05735
301	furfural	furfural	98-01-1	C5H4O2	96.09	1.16	82.8	1.524	25.34	41.9	3.57	-37	162	1.54985	0.130729	1.33039	3819.65	0.221661	1.1691	9.818	1.7496
302	heptanal	heptanal	111-71-7	C7H14O	114.19	0.85	134.4	1.426	34.42	9.07	2.56	-43	155	0.776898	2.29645	9.94115	1858.25	0.455964	0.0051	16.7107	1.4102
303	heptane	n-heptane	142-82-5	C7H16	100.2	0.684	146.6	1.388	34.55	1.92	0	-90	98	0.407097	4.3966	104.969	1658.61	3.24718	0	17.691	0
304	heptanol	1-heptanol	111-70-6	C7H16O	116.2	0.819	141.9	1.423	36.14	12.1	1.71	-35	176	6.38912	2.5651	0.464525	1848.13	0.475698	0.7356	16.8774	1.15365
305	hexadecane	n-hexadecane	544-76-3	C16H34	226.45	0.77	294.1	1.435	76.74	2.05	0.06	18	287	4.616	9.15146	0.00277913	1182.78	3.25374	0	35.6857	0
306	hexafluorobenzene	hexafluorobenzene	392-56-3	C6F6	186.06	1.612	115.4	1.378	26.61	2.05	0	4	81	0.500733	2.9892	125.557	2504.4	2.53427	0.0323	16.2559	0
307	hexamethylphosphoramide	hexamethylphosphoramide	680-31-9	C6H18N3OP	179.2	1.03	174	1.466	48.19	30	5.54	7	235	1.62031	1.23494	0.0764648	1686.39	-0.760117	0	19.2414	1.75855
308	hexane	hexane	110-54-3	C6H14	86.18	0.659	130.7	1.375	29.91	1.9	0.08	-95	69	0.308872	3.86102	354.195	1761.36	3.21213	0	15.6879	0
309	hexanenitrile	hexanenitrile	628-73-9	C6H11N	97.16	0.805	120.7	1.407	29.71	17.26	3.48	-80	162	0.725943	1.34196	4.74057	2278.14	0.229107	0.29015	14.5733	1.36705
310	hexanoic acid	n-hexanoicacid	142-62-1	C6H12O2	116.16	0.92	126.3	1.416	31.7	2.63	1.13	-3	203	8.29229	1.83652	0.257068	2174.57	-1.53973	0.8965	14.4292	1.78315
311	hexyl acetate	n-hexylacetate	142-92-7	C8H16O2	144.21	0.871	165.6	1.409	40.93	4.42	1.86	-80	169	1.27492	2.93784	0.786394	1708.39	0.506	0.02845	19.5349	1.74825
312	hexylamine	hexylamine	111-26-2	C6H15N	101.19	0.766	132.1	1.418	33.29	4.08	1.32	-19	130	0.824921	2.27999	15.9132	1861.32	-0.0316851	0.574	15.7369	0.87515
313	iodobenzene	iodobenzene	591-50-4	C6H5I	204.01	1.831	111.4	1.62	39.14	4.6	1.71	-29	188	1.48305	2.80908	0.599339	2711.56	1.14307	0.1926	15.2122	0
314	iodoethane	iodoethane	75-03-6	C2H5I	155.97	1.95	80	1.39	18.97	7.4	1.8	-111	72	0.395619	1.77628	91.7851	2891.97	0.668433	0.07565	11.0206	0
315	iodomethane	ch3i	74-88-4	CH3I	141.94	2.282	62.2	1.532	19.27	6.92	1.63	-67	42	0.328169	1.3042	274.759	3610.75	0.336741	0.224	8.9707	0
316	isoprene	isoprene	78-79-5	C5H8	68.12	0.681	100	1.422	25.42	2.1	0.29	-144	34	0.270229	2.39342	972.46	2331.34	1.20807	0.00205	12.4398	0.0161
317	isopropylamine	isopropylamine	75-31-0	C3H9N	59.11	0.694	85.2	1.377	19.6	5.5	1.19	-101	32	0.512318	0.655899	452.482	2486.5	-0.765548	0.54095	9.72305	0.8265
318	isoquinoline	isoquinoline	119-65-3	C9H7N	129.16	1.097	117.7	1.622	41.47	10.7	2.73	26	242	2.66705	1.54684	0.150871	2686.04	0.318834	0.15305	15.3468	0.9199
319	methyl 2-hydroxybenzoate	2-hydroxy-benzoicacidmethylester	119-36-8	C8H8O3	152.15	1.174	129.6	1.537	40.47	9	2.47	-9	224	2.03974	2.73104	0.212257	2252.51	0.312958	0.27785	16.4328	1.2158
320	methyl 2-propenoate	methylacrylate	96-33-3	C4H6O2	86.09	0.951	90.5	1.408	22.33	7.12	1.75	-75	80	0.538924	0.882136	64.3593	2838.27	-0.0395457	0.1518	11.0394	1.5991
321	methyl acetate	methylacetate	79-20-9	C3H6O2	74.08	0.927	79.9	1.362	17.72	6.7	1.69	-98	57	0.430395	0.222852	189.302	2917.78	-0.35917	0.04965	9.51965	1.7728
322	methyl benzoate	methylbenzoate	93-58-3	C8H8O2	136.15	1.084	125.6	1.517	38.01	6.6	1.92	-13	200	2.00655	2.0924	0.318383	2399.32	0.384816	0.0806	15.9462	1.35505
323	methyl butanoate	methylbutyrate	623-42-7	C5H10O2	102.13	0.898	113.7	1.387	26.78	5.5	1.72	-85	102	0.61973	1.4785	62.1271	2157.05	0.0939808	0.0118	13.5592	1.6683
324	methyl decanoate	decanoicacidmethylester	110-42-9	C11H22O2	186.29	0.873	213.4	1.426	54.68	3.86	1.65	-18	228	3.07572	4.65553	0.0365163	1457.51	0.978987	0.013	25.4223	1.6855
325	methyl dodecanoate	dodecanoicacidmethylester	111-82-0	C13H26O2	214.35	0.87	246.4	1.432	63.9	3.6	1.7	5	262	5.42513	5.73499	0.00375084	1346.45	1.16611	0.0122	29.4593	1.672
326	methyl formate	methylformate	107-31-3	C2H4O2	60.05	0.98	61.3	1.343	12.95	8.5	1.77	-100	32	0.394596	-0.152104	1188.86	3893.72	-0.239851	0.48835	7.18985	1.636
327	methyl hexanoate	methylhexanoate	106-70-7	C7H14O2	130.19	0.885	147.1	1.405	36.05	4.7	1.7	-71	149	1.03392	2.52817	3.46777	1820.52	0.453187	0.01275	17.4755	1.6657
328	methyl octanoate	methyloctanoate	111-11-5	C9H18O2	158.24	0.878	180.2	1.417	45.32	4.13	1.67	-40	192	1.76994	3.58635	0.367736	1608.72	0.741905	0.0123	21.436	1.6673
329	methyl pentanoate	methylvalerate	624-24-8	C6H12O2	116.16	0.89	130.5	1.397	31.43	5.02	1.62	-91	127	0.782673	2.00108	10.2237	1967.95	0.282405	0.0135	15.5345	1.66445
330	methyl propanoate	methylpropionate	554-12-1	C4H8O2	88.11	0.915	96.3	1.377	22.15	6.23	1.67	-88	79	0.492749	0.90333	90.6742	2437.99	-0.13275	0.01285	11.5438	1.67205
331	methyl thiocyanate	methylthiocyanate	556-64-9	C2H3NS	73.12	1.074	68.1	1.469	18.94	35	3.34	-5	131	0.543456	0.148888	11.9587	4532.18	0.723536	0.7052	9.0461	1.0952
332	methyl trichloroacetate	methyltrichloroacetate	598-99-2	C3H3Cl3O2	177.41	1.488	119.2	1.457	32.47	8.79	2.33	-18	152	0.870047	2.65432	2.50075	2201.06	0.644281	0.2871	15.626	0.70235
333	methylbutane	methylbutane	78-78-4	C5H12	72.15	0.616	117.1	1.354	25.46	1.83	0.12	-160	28	0.223429	3.19591	1407.04	1896.93	3.11356	0	13.3177	0
334	methylcyclohexane	methylcyclohexane	108-87-2	C7H14	98.19	0.77	127.5	1.423	32.47	2.02	0	-126	101	0.538352	3.59853	74.8671	1727.49	3.18373	0	15.0454	0
335	methylcyclopentane	methylcyclopentane	96-37-7	C6H12	84.16	0.751	112.1	1.41	27.76	1.99	0	-143	71	0.412694	3.29204	221.981	1813.71	3.1154	0	13.8468	0
336	methylsulfanylbenzene	methylthiobenzene	100-68-5	C7H8S	124.21	1.057	117.5	1.585	39.38	4.76	1.31	-15	188	1.63597	2.63927	0.628427	2480.51	0.792713	0.14185	15.9746	0.18755
337	morpholine	morpholine	110-91-8	C4H9NO	87.12	1	87.1	1.455	23.64	7.4	1.71	-5	129	1.55477	-0.159707	7.1658	2574.25	-0.357011	0.5276	10.1606	1.6307
338	N,N,N',N'-tetramethylurea	tetramethylurea	632-22-4	C5H12N2O	116.16	0.968	120	1.451	32.29	24.46	3.47	-1	177	0.848156	0.457117	2.83927	2086.13	-0.796228	0	14.6203	1.6994
339	N,N-diethylaniline	n,n-diethyl-benzeneamine	91-66-7	C10H15N	149.24	0.935	159.6	1.542	50.2	5.5	3.79	-21	215	1.90853	3.81358	0.15779	1834.34	1.15735	0.00475	20.2729	0.1084
340	N,N-dimethylaniline	n,n-dimethylaniline	121-69-7	C8H11N	121.18	0.956	126.8	1.558	40.87	4.4	1.61	2	194	1.36745	2.81304	1.07869	2171.59	0.861793	0.0166	16.7985	0.15175
341	N,N-dimethylcyclohexylamine	n,n-dimethylcyclohexylamine	98-94-2	C8H17N	127.23	0.85	149.7	1.454	40.53	2.86	0.76	-60	160	0.967266	3.28387	7.07019	1649.4	1.34191	0	17.3664	0.511
342	N-methylacetamide	n-methylacetamide	79-16-3	C3H7NO	73.09	0.946	77.3	1.433	20.08	178.9	4.12	28	205	2.68459	-1.37359	0.431025	3570.59	0.261337	0.8132	8.93265	1.92715
343	N-methylaniline	n-methylaniline	100-61-8	C7H9N	107.16	0.99	108.2	1.571	35.56	6	1.73	-57	195	1.52323	2.00287	1.07798	2545.98	-0.413503	0.6798	14.4193	0.2947
344	N-methylcyclohexylamine	n-methylcyclohexanamine	100-60-7	C7H15N	113.2	0.868	130.4	1.455	35.38	3.64	1.29	-8	149	1.06719	2.53372	7.20941	1777.64	0.516263	0.28055	15.4976	0.67575
345	N-methylformamide	methylformamide	123-39-7	C2H5NO	59.07	1.003	58.9	1.432	15.27	171	3.83	-3	199	2.27745	-1.81883	1.1464	4958.52	0.880406	0.94975	6.9111	1.88365
346	N-methylpiperidine	n-methylpiperidine	626-67-5	C6H13N	99.18	0.816	121.5	1.437	31.84	2.59	0.77	-18	106	0.675003	2.44996	43.2257	1840.17	0.899087	0	14.2152	0.5398
347	naphthalene	naphthalene	91-20-3	C10H8	128.17	1.14	112.4	1.59	37.93	2.54	0	80	218	1.98457	2.96877	0.642129	2337.37	0.902817	0.0345	16.8066	0
348	nitric acid	nitricacid	7697-37-2	HNO3	63.01	1.513	41.7	1.397	10.03	40	2.16	-42	83	0.221753	1.0709	4757.91	2480.59	-16.9155	1.4959	6.32765	0.04525
349	nitrobenzene	nitrobenzene	98-95-3	C6H5NO2	123.11	1.204	102.3	1.552	32.67	34.8	4.28	6	211	1.41233	1.95609	0.656538	2854.92	0.243843	0.543	13.6377	0.75845
350	nitroethane	nitroethane	79-24-3	C2H5NO2	75.07	1.054	71.2	1.391	16.92	19.7	3.61	-90	114	0.464408	0.615288	74.9307	3559.2	0.00263721	0.8983	8.84835	0.95685
351	nitromethane	nitromethane	75-52-5	CH3NO2	61.04	1.137	53.7	1.382	12.49	39.4	3.46	-29	103	0.519135	-0.00502013	56.488	5719.46	0.38149	1.41885	6.48395	0.9337
352	nonane	n-nonane	111-84-2	C9H20	128.26	0.718	178.6	1.403	43.59	1.96	0.07	-53	151	0.668641	5.44572	9.8026	1507.83	3.27686	0	21.6711	0
353	nonanol	1-nonanol	1430-8-8	C9H20O	144.26	0.827	174.4	1.433	45.34	8.83	1.6	-7	215	12.5695	3.61657	0.0406878	1637	0.63155	0.73375	20.888	1.1504
354	octane	octane	111-65-9	C8H18	114.23	0.703	162.5	1.395	38.96	1.96	0	-57	126	0.536115	4.92974	15.8601	1577.73	3.26425	0	19.691	0
355	octanoic acid	1-bromo-1,2,2,2-tetrafluoroethane	124-7-2	C8H16O2	144.21	0.91	158.5	1.428	40.75	3.2	1.15	17	237	0.237972	2.1937	2259.72	2564.95	-2.90998	0.9699	11.8274	0
356	octylamine	1-octanamine	111-86-4	C8H19N	129.25	0.782	165.3	1.429	42.63	3.58	1.17	0	177	1.45944	3.35189	1.48535	1641.66	0.24884	0.5757	19.7875	0.8326
357	oxane	thp	142-68-7	C5H10O	86.13	0.88	97.9	1.42	24.77	5.68	1.74	-45	88	0.593504	1.30245	86.4027	2071.5	0.132598	0	11.6474	1.02565
358	oxirane	ethyleneoxide	75-21-8	C2H4O	44.05	0.89	49.5	1.36	10.93	13.9	1.89	-111	11	0.316991	-0.179477	1904.9	3633.14	-0.704591	0.0182	6.78985	1.21705
359	oxolan-2-one	gamma-butyrolactone	96-48-0	C4H6O2	86.09	1.125	76.5	1.437	20.05	40.96	4.27	-43	205	1.07594	-0.812864	0.835789	3253.37	-0.0347066	0.105	9.36285	2.23485
360	pentachloroethane	pentachloroethane	76-01-7	C2HCl5	202.29	1.68	120.4	1.503	35.6	3.9	0.92	-29	162	0.741902	3.17441	5.53392	2078.41	-0.165309	0.73175	15.6297	0
361	pentanal	valeraldehyde	110-62-3	C5H10O	86.13	0.816	105.5	1.405	25.84	10.1	2.57	-92	104	0.472936	1.20793	88.8526	2223.9	0.0539394	0.00515	12.7278	1.4079
362	pentane	pentane	109-66-0	C5H12	72.15	0.626	115.2	1.358	25.27	1.84	0	-129	36	0.236191	3.33399	1061	1885.85	3.15658	0	13.7223	0
363	pentanenitrile	valeronitrile	110-59-8	C5H9N	83.13	0.795	104.5	1.397	25.17	17.7	4.12	-96	140	0.581643	0.810819	12.7438	2562.21	0.136028	0.2903	12.5948	1.3666
364	pentanoic acid	n-bucooh	109-52-4	C5H10O2	102.13	0.93	109.8	1.408	27.09	2.6	1.61	-35	187	6.15047	1.29762	0.700212	2426.06	-1.63288	0.89705	12.4248	1.79185
365	pentyl acetate	n-pentylacetate	628-63-7	C7H14O2	130.19	0.875	148.8	1.402	36.23	4.75	1.75	-100	149	0.903627	2.47697	1.95057	1817.03	0.395345	0.0341	17.5704	1.7746
366	pentyl formate	formicacidpentylester	638-49-3	C6H12O2	116.16	0.885	131.3	1.4	31.82	6.49	1.92	-73	131	0.895	2.06847	10.1353	1987.02	0.228102	0.40105	15.272	1.6388
367	pentylamine	n-pentylamine	110-58-7	C5H13N	87.16	0.754	115.5	1.411	28.72	4.5	1.3	-55	105	0.63271	1.74355	49.5662	2011.56	-0.222146	0.5757	13.7367	0.87425
368	perfluoro(methylcyclohexane)	perfluoromethylcyclohexane	355-02-2	C7F14	350.05	1.8	194.5	1.3	36.37	1.86	0.28	-70	76	0.539989	4.52857	85.125	2020.43	5.25667	0.0398	21.6853	0
369	perfluoro-n-octane	perfluorooctane	307-34-6	C8F18	438.06	1.759	249	1.284	44.27	1.81	0	-23	104	0.531622	6.05679	45.4053	1823.97	5.28592	0.0852	27.9288	0
370	phenol	phenol	108-95-2	C6H6O	94.11	1.058	89	1.542	28	10	1.55	41	182	4.42088	1.36187	0.715268	3284.53	-4.32877	0.96335	11.4975	0.6696
371	phenyl acetate	phenylacetate	122-79-2	C8H8O2	136.15	1.078	126.3	1.503	37.34	5.23	1.78	50	196	2.23011	1.70114	0.296931	2528.43	0.323264	0.2564	15.787	1.5072
372	phenyl isothiocyanate	phenylisothiocyanat	103-72-0	C7H5NS	135.19	1.129	119.8	1.649	43.64	10.4	2.85	-21	219	1.71229	3.20336	0.402215	2682.59	1.29881	0.2344	17.1705	0
373	phenylhydrazine	phenyl-hydrazine	100-63-0	C6H8N2	108.14	1.098	98.5	1.609	34.1	7.2	1.67	23	242	4.04322	0.508427	0.109304	3331.06	-0.581585	1.83035	12.1949	0.8815
374	phenylisocyanate	isocyanatobenzene	103-71-9	C7H5NO	119.12	1.096	108.7	1.537	33.95	8.8	2.25	-33	166	1.12281	2.74247	4.96011	2727.32	0.950488	0.20015	15.3812	0.04205
375	phosphorus oxychloride	pocl3	10025-87-3	Cl3OP	153.33	1.68	91.3	1.46	25	13.5	2.54	1	107	0.430048	2.14332	57.079	2351.49	1.19722	0.3093	12.0954	0.93835
376	phosphorus trichloride	pcl3	7719-12-2	Cl3P	137.33	1.576	87.1	1.515	26.26	3.7	0.56	-94	75	0.404044	2.77598	82.9582	2394.72	2.43597	0.57995	12.0498	0
377	piperidine	piperidine	110-89-4	C5H11N	85.15	0.862	98.8	1.453	26.67	5.9	0.73	-7	106	0.906092	1.49333	49.4601	2085.86	-0.0919251	0.4007	11.8374	0.66805
378	propanal	propanal	123-38-6	C3H6O	58.08	0.803	72.4	1.38	16.76	18.5	2.52	-81	49	0.317716	0.10012	747.601	2993.87	-0.414435	0.00995	8.73095	1.4118
379	propane	propane	74-98-6	C3H8	44.1	0.581	75.9	1.34	15.9	1.6	0.08	-188	-42	0.140979	2.26715	14556.8	2260.68	2.90179	0	9.7387	0
380	propanedinitrile	dicyanomethane	109-77-3	C3H2N2	66.06	1.049	63	1.415	15.76	46	3.73	31	220	2.24421	-1.24907	0.0753559	12607.3	2.47271	2.47265	6.8854	1.43935
381	propanenitrile	propionitrile	107-12-0	C3H5N	55.08	0.792	69.6	1.366	15.58	27.7	4.04	-92	97	0.394815	-0.348401	69.8855	3873.87	0.24183	0.3581	8.52835	1.36255
382	propanoic acid	propionicacid	79-09-4	C3H6O2	74.08	0.99	74.8	1.386	17.58	3.1	1.76	-21	141	3.92289	0.169026	4.4424	3383.22	-1.63508	0.9013	8.44205	1.78355
383	propanol	propanol	71-23-8	C3H8O	60.1	0.804	74.8	1.386	17.55	21.8	1.65	-127	97	2.42728	0.411871	30.4069	2835.62	0.0227071	0.73035	8.93385	1.1721
384	propene	propene	115-07-1	C3H6	42.08	0.61	68.9	1.363	15.31	1.9	0.36	-185	-48	0.161958	1.73442	11869.5	2605.36	1.15717	0	9.1563	0.1213
385	propyl acetate	n-propylacetate	109-60-4	C5H10O2	102.13	0.888	115	1.384	26.89	6.3	1.79	-95	102	0.567846	1.40737	13.9549	2153.29	0.0186991	0.0344	13.5503	1.77545
386	propyl formate	n-propylformate	110-74-7	C4H8O2	88.11	0.906	97.2	1.377	22.37	7.72	1.83	-93	82	0.465224	1.06517	41.0134	2457.99	-0.114906	0.40095	11.2831	1.64175
387	propyl nitrate	propylnitrate	627-13-4	C3H7NO3	105.09	1.054	99.7	1.397	24.03	13.9	3.01	-100	110	0.410194	2.65316	150.33	2188.53	0.14122	0.41335	13.4589	0.1474
388	propyl propanoate	propylpropionate	106-36-5	C6H12O2	116.16	0.882	131.7	1.393	31.43	4.7	1.79	-76	122	0.654807	1.98909	9.58677	1939	0.26495	0.00095	15.5613	1.68285
389	propylamine	n-propylamine	107-10-8	C3H9N	59.11	0.717	82.4	1.388	19.45	5.9	1.18	-83	48	0.371568	0.670213	469.489	2493.02	-0.75518	0.58295	9.7545	0.874
390	propylbenzene	n-propylbenzene	103-65-1	C9H12	120.19	0.864	139.1	1.493	40.42	2.37	0.42	-92	159	1.1553	3.61225	3.96688	1899.16	1.39415	0.0052	17.8909	0
391	pyrazine	pyrazine	290-37-9	C4H4N2	80.09	1.031	77.7	1.495	22.66	2.8	0	52	115	1.05541	-0.335234	14.0951	4172.59	0.565288	0.47425	9.3759	1.41835
392	pyridine	pyridine	110-86-1	C5H5N	79.1	0.983	80.5	1.51	24.07	12.4	2.37	-42	115	0.833274	0.530938	19.5832	3350.01	0.0720897	0.1338	10.6517	0.93335
393	pyrrole	pyrrole	109-97-7	C4H5N	67.09	0.967	69.4	1.509	20.72	7.5	1.71	-23	130	1.12888	0.592249	8.14118	4291.05	-1.78864	1.0532	8.7738	0.7619
394	pyrrolidine	pyrrolidine	123-75-1	C4H9N	71.12	0.866	82.1	1.443	21.78	8.3	1.57	-63	87	0.66649	0.975145	120.402	2300.22	-0.570155	0.3468	10.4126	0.84645
395	quinoline	chinoline	91-22-5	C9H7N	129.16	1.093	118.2	1.626	41.83	9	2.25	-15	238	2.64863	1.65394	0.142722	2671.58	0.413211	0.15725	15.4356	0.88245
396	salicylaldehyde	1-(2-thienyl)ethanethiol	90-2-8	C7H6O2	122.12	1.167	104.6	1.574	34.51	17.1	2.78	-7	197	2.16142	2.65471	0.135011	2401.47	0.451029	0.60455	16.1433	0.53205
397	styrene	styrene	100-42-5	C8H8	104.15	0.909	114.6	1.546	36.28	2.43	0.18	-30	145	1.02284	2.72582	7.63452	2412.39	0.879161	0.0429	15.3947	0.0073
398	sulfolane	tetrahydrothiophene-1,1-dioxide	126-33-0	C4H8O2S	120.17	1.26	95.4	1.471	26.66	44	4.68	27	285	2.76847	-1.72399	0.00407536	3131.04	0.415429	0.6625	10.1634	3.174
399	sulfuryl chloride	sulfurylchloride	7791-25-5	Cl2O2S	134.97	1.671	80.8	1.443	21.43	10	1.81	-54	70	0.261861	2.74921	706.748	2272.89	1.04203	0.3603	11.7523	0
400	tetrachloroethene	tetrachloroethene	127-18-4	C2Cl4	165.83	1.63	101.7	1.504	30.13	2.3	0	-36	122	0.429389	3.24839	58.0271	2222.8	2.86978	0	14.748	0
401	tetrachloromethane	ccl4	56-23-5	CCl4	153.82	1.584	97.1	1.46	26.59	2.24	0	-23	77	0.355668	2.89248	130.814	2271.61	2.9125	0.0082	13.4139	0
402	tetrahydronaphthalene	tetralin	119-64-2	C10H12	132.21	0.974	135.7	1.539	42.52	2.77	0.61	-31	205	1.66613	3.51345	1.29118	1858.17	1.4241	0	17.6111	0.0013
403	tetramethylsilane	tetramethylsilane	75-76-3	C4H12Si	88.22	0.646	136.6	1.359	30.07	1.92	0.48	-100	27	0.305362	3.53725	2402.68	1756.81	2.79746	0	15.1038	0
404	tetranitromethane	tetranitro-methane	509-14-8	CN4O8	196.03	1.643	119.4	1.44	31.44	2.52	0	14	126	0.0874426	5.63863	437	981.285	-3.60237	1.13195	15.3699	0
405	thiane	tetrahydro-2h-thiopyran	1613-51-0	C5H10S	102.2	0.988	103.4	1.506	30.73	6.58	1.71	19	141	0.808554	2.13353	13.5405	2079.63	0.949719	0	13.0194	0.779
406	thionyl chloride	thionylchloride	7719-09-7	Cl2OS	118.97	1.637	72.7	1.52	22.12	9.25	1.44	-105	77	0.369685	2.1197	139.541	2816.26	0.702171	1.05095	10.5058	0
407	thiophene	biurea	110-2-1	C4H4S	84.14	1.059	79.5	1.529	24.5	2.71	0.56	-38	84	472.117	-4.98008	1.1166e-09	11745.5	5.47397	4.29025	6.25935	3.7651
408	trans-1,2-dichloroethene	trans-1,2-dichloroethene	156-60-5	C2H2Cl2	96.94	1.252	77.4	1.446	20.63	2.27	0	-49	48	0.310461	1.97967	610.003	2646.26	-0.51011	1.12125	10.2163	0
409	trans-decalin	trans-decalin	493-02-7	C10H18	138.25	0.87	158.9	1.47	44.32	2.17	0	-31	185	1.31112	4.41334	2.75682	1531.55	3.25216	0	18.368	0
410	triacetin	glycerol-triacetate	102-76-1	C9H14O6	218.21	1.156	188.7	1.428	48.55	7.01	2.73	-78	259	8.19539	0.890475	0.00015452	2065.13	0.0558023	0.8225	20.079	4.3812
411	tribromomethane	chbr3	75-25-2	CHBr3	252.73	2.827	89.4	1.595	30.38	4.4	1	7	148	0.750253	2.51024	4.66328	4114.77	0.356136	0.818	12.429	0
412	tributylamine	tri-n-butylamine	102-82-9	C12H27N	185.35	0.778	238.2	1.428	61.29	2.29	0.76	-70	216	1.73114	6.58057	0.127778	1328.7	1.88906	0	27.9792	0
413	trichloroethanenitrile	trichloroacetonitrile	545-06-2	C2Cl3N	144.39	1.44	100.3	1.44	26.43	7.74	2	-44	83	0.424836	2.27136	61.2051	2735.37	2.4123	0.05035	13.6134	0.2777
414	trichloroethene	trichloroethene	79-01-6	C2HCl3	131.39	1.464	89.7	1.475	25.27	3.42	0.81	-86	87	0.365039	2.62503	160.448	2387.82	0.692233	0.63805	12.456	0
415	trichlorofluoromethane	cfcl3	75-69-4	CCl3F	137.37	1.476	93.1	1.383	21.71	2.38	0.48	-80	24	0.244166	2.64545	825.517	2322.11	2.89998	0.00435	12.3155	0
416	trichloromethane	chcl3	67-66-3	CHCl3	119.38	1.489	80.2	1.446	21.37	4.81	1.15	-64	61	0.359806	2.08912	198.872	2541.15	-1.76861	0.88265	10.874	0
417	trichloronitromethane	trichloronitromethane	76-06-2	CCl3NO2	164.37	1.651	99.6	1.461	27.31	7.32	1.86	-64	112	0.374226	3.11175	123.471	2142.46	1.3042	0.32115	13.9329	0.0059
418	tricyclo[5.2.1.02,6]deca-3,8-diene	dicyclopentadiene	77-73-6	C10H12	132.21	0.976	135.5	1.511	40.58	2.49	0.4	33	167	1.37047	3.59032	3.00809	1805.98	1.91486	0	16.7079	0.1623
419	triethyl phosphate	triethylphosphate	78-40-0	C6H15O4P	182.16	1.072	169.9	1.405	41.67	13.01	2.86	-57	215	2.36315	1.38553	0.0236472	1847.23	-0.126152	0.00065	19.4576	2.7007
420	trifluoroacetic acid	trifluoroaceticacid	76-05-1	C2HF3O2	114.02	1.489	76.6	1.285	13.66	8.55	2.26	-15	72	0.910205	1.36512	106.212	3442.8	-10.4998	1.28625	9.5322	0.54825
421	trifluoromethylbenzene	benzoylchloride	98-8-8	C7H5F3	146.11	1.199	121.9	1.415	30.52	9.4	2.86	-29	101	1.3701	2.76855	0.692049	2454.19	0.594539	0.3198	15.6252	0.2542
422	trimethyl phosphate	trimethylphosphate	512-56-1	C3H9O4P	140.08	1.213	115.5	1.395	27.69	21.26	2.82	-46	197	1.51947	0.0606734	0.347398	2573.42	-0.128403	0.10655	13.8884	2.45915
423	triphenylmethane	triphenylmethane	519-73-3	C19H16	244.34	1.013	241.1	1.579	80.1	2.45	0	93	360	37.8279	5.2507	1.1016e-05	1738.55	0.95936	0.03445	28.6033	0
424	undecane	n-undecane	1120-21-4	C11H24	156.31	0.737	212.1	1.417	53.34	2.01	0	-26	196	1.20283	6.52017	0.484257	1386.26	3.29214	0	25.6707	0
425	undecanol	1-undecanol	112-42-5	C11H24O	172.31	0.83	207.7	1.439	54.64	5.98	1.7	19	243	19.7287	4.69781	0.00456339	1481.5	0.778703	0.733	24.865	1.15135
426	vinyl acetate	vinylacetate	108-05-4	C4H6O2	86.09	0.925	93.1	1.396	22.36	2.3	1.61	-100	73	0.518632	1.36203	85.2165	2773.96	0.0631309	0.212	11.5021	1.2462
427	water	h2o	7732-18-5	H2O	18.02	1	18	1.333	3.71	80.1	1.87	0	100	0.897982	-1.59346	31.5604	26223.9	6.30144	1.6939	1.20485	1.40825
428	2-butanol	2-butanol	78-92-2	C4H10O	74.12	0.807	91.8	1.395	22.02	16.56	1.41	-115	100	2.2596	0.978292	20.8623	2408.21	0.150657	0.63855	10.8805	1.0538
429	2-pentanone	2-pentanone	107-87-9	C5H10O	86.13	0.808	106.6	1.39	25.27	15.45	2.7	-78	101	0.486681	0.90183	52.4848	2227.41	-0.280909	0.00785	12.5415	1.5288
430	4-methyl-2-pentanone	4-methyl-2-pentanone	108-10-1	C6H12O	100.16	0.801	125.1	1.396	30.03	13.11	2.69	-85	118	0.552706	1.43881	22.8001	2014.07	0.123594	0.01245	14.2223	1.4509
431	2-propanone	acetone	67-64-1	C3H6O	58.09	0.79	73.5	1.359	16.17	21.4	2.69	-97	57	0.350149	-0.303521	28.991	3009.7	-0.615046	0.02	8.58	1.66
432	cyclohexanone	cyclohexanone	108-94-1	C6H10O	98.14	0.948	103.5	1.448	27.71	18.2	3.06	-32	156	0.901428	0.901428	6.59504	2164.87	-0.229297	0.0001	12.1679	1.68155
433	2-butanone	butanone	78-93-3	C4H8O	72.11	0.805	89.6	1.379	20.69	18.51	2.76	-86	80	0.410021	0.370051	156.689	2538.41	-0.368989	0.00725	10.5457	1.5261
434	toluene	toluene	108-88-3	C7H8	92.14	0.867	106.3	1.497	31.1	2.38	0.31	-93	111	0.713424	2.59808	33.4868	2305.64	1.07069	0.0045	14.0878	0
435	acetonitrile	acetonitrile	75-05-8	C2H3N	41.05	0.782	52.5	1.344	11.12	37.5	3.44	-45	82	0.414353	-1.04932	65.8237	6321.2	1.21706	0.81735	6.098	1.36765
436	diethyl carbonate	diethylcarbonate	105-58-8	C5H10O3	118.13	0.975	121.2	1.384	28.33	3.1	1.07	-43	127	0.822933	1.32237	12.319	2197.41	0.0154683	0.00015	14.3465	2.11315
437	dimethyl sulfoxide	dimethylsulfoxide	67-68-5	C2H6OS	78.14	1.1	71	1.479	20.15	46.68	4.1	19	189	1.14217	-1.92932	0.827669	3396.62	-0.695663	0.5797	8.5679	2.0425
438	tetrahydrofuran	thf	109-99-9	C4H8O	72.11	0.888	81.2	1.407	20	7.58	1.75	-108	66	0.470956	0.700065	205.695	2305.04	-0.439348	0	10.1152	1.08515
439	N-methylpyrrolidon	n-methyl-2-pyrrolidinone	872-50-4	C5H9NO	99.13	1.03	96.2	1.47	26.84	32.2	4.09	-24	202	1.12489	-0.457977	1.41202	2382.49	-0.944042	0	12.0083	1.92975
440	diethyl ether	diethylether	60-29-7	C4H10O	74.12	0.713	103.9	1.352	22.5	4.33	1.15	-117	35	0.263121	1.59871	515.541	2114.17	0.391493	0	12.0829	0.9649
441	N,N-dimethylformamide	dimethylformamide	68-12-2	C3H7NO	73.09	0.949	77	1.431	19.92	36.71	3.86	-60	153	0.528911	-0.947959	25.5363	2951.59	-0.88554	0.0399	9.712	1.8607
442	triethylamine	triethylamine	121-44-8	C6H15N	101.19	0.728	139.1	1.401	33.79	2.42	0.87	-115	90	0.394853	3.33688	116.084	1756.64	0.874755	0	15.971	0.01285
443	3-methylbutyl acetate	isoamylacetate	123-92-2	C7H14O2	130.19	0.876	148.6	1.4	36.03	5.6	1.84	-78	142	0.98689	2.28532	3.24907	1835.91	0.347459	0.0241	16.9028	1.7473
444	bis(2-methoxyethyl) ether	diglyme	111-96-6	C6H14O3	134.18	0.937	143.2	1.408	35.33	7.3	1.92	-64	162	0.759321	0.759321	0.711532	1948.83	-0.111568	0	16.834	2.75845
445	4-methyl-2-oxo-1,3-dioxolane	propylenecarbonate	108-32-7	C4H6O3	102.09	1.201	85	1.421	21.56	64.9	4.94	-55	242	1.79678	-0.381319	0.0591249	3623.31	0.496175	0.58815	10.1396	2.1004
446	octanol	1-octanol	111-87-5	C8H18O	130.23	0.827	157.5	1.427	40.43	10.3	1.68	-16	194	8.51985	3.10588	0.1659	1730.04	0.561976	0.7368	18.8907	1.1451
447	dimethyl carbonate	dimethylcarbonate	616-38-6	C3H6O3	90.08	1.073	84	1.368	18.9	3.17	0.93	3	90	0.533079	0.256873	86.6995	3002.72	-0.131726	0.08015	10.3582	1.98315
448	cyclohexane	cyclohexane	110-82-7	C6H12	84.16	0.779	108.1	1.426	27.71	1.88	0	7	81	0.414832	0.414832	253.739	1852.52	3.15129	0	13.1171	0
449	methoxybenzene	anisole	100-66-3	C7H8O	108.14	0.99	109.2	1.517	33.04	4.33	1.38	-37	154	1.16143	2.17501	4.03157	2475.46	0.574978	0.04835	14.4799	0.52325
450	2,2,4-trimethylpentane	2,2,4-trimethylpentane	540-84-1	C8H18	114.23	0.692	165.1	1.391	39.26	1.94	0	-107	99	0.420757	4.33096	70.6649	1585.7	3.15668	0	17.9617	0
451	2-methyl-1-propanol	isobutanol	78-83-1	C4H10O	74.12	0.802	92.5	1.396	22.21	16.68	1.79	-108	108	2.55843	1.0012	16.2807	2429.23	0.0258896	0.7091	10.775	1.06715
452	benzonitrile	benzonitrile	100-47-0	C7H5N	103.12	1	103.1	1.528	31.75	26	4.28	-13	190	1.45021	1.45021	102.169	3417.4	0.817334	0.5431	12.921	1.1168
453	1,4-butanediol	1,4-butadiol	110-63-4	C4H10O2	90.12	1.017	88.6	1.446	23.63	32.9	2.58	20	235	19.3658	-0.315084	0.0277695	2275.41	0.698359	0.8386	10.4007	1.81145
454	hexanol	1-hexanol	111-27-3	C6H14O	102.18	0.814	125.6	1.418	31.63	13.3	1.65	-47	158	5.11522	2.03148	1.22127	2001.85	0.353315	0.7269	14.9099	1.1737
455	butyl acetate	n-butylacetate	123-86-4	C6H12O2	116.16	0.88	132.1	1.394	31.6	5.01	1.84	-74	126	0.687851	0.687851	5.38151	1964.05	0.217061	0.03525	15.5485	1.77705
456	triethoxymethane	triethyl orthoformate	122-51-0	C7H16O3	148.2	0.893	166	1.39	39.34	4.779	1.67	-61	143	1.08015	1.78911	0.562384	1758.45	0.216055	0	18.6336	2.1443
457	N,N-dimethylacetamide	n,n-dimethylacetamide	127-19-5	C4H9NO	87.12	0.942	92.5	1.438	24.31	37.78	3.72	-20	165	0.628782	-0.49896	10.1122	2548.2	-0.945743	0.0151	11.4326	1.83645
458	diisopropyl ether	diisopropylether	108-20-3	C6H14O	102.18	0.724	141.1	1.368	31.8	4.04	1.13	-86	68	0.472182	2.51057	28.7151	1792.09	0.830829	0	15.5796	0.7865
